# Supplementary material
Source: PubMed Central journal article supplement (PMC9381106)

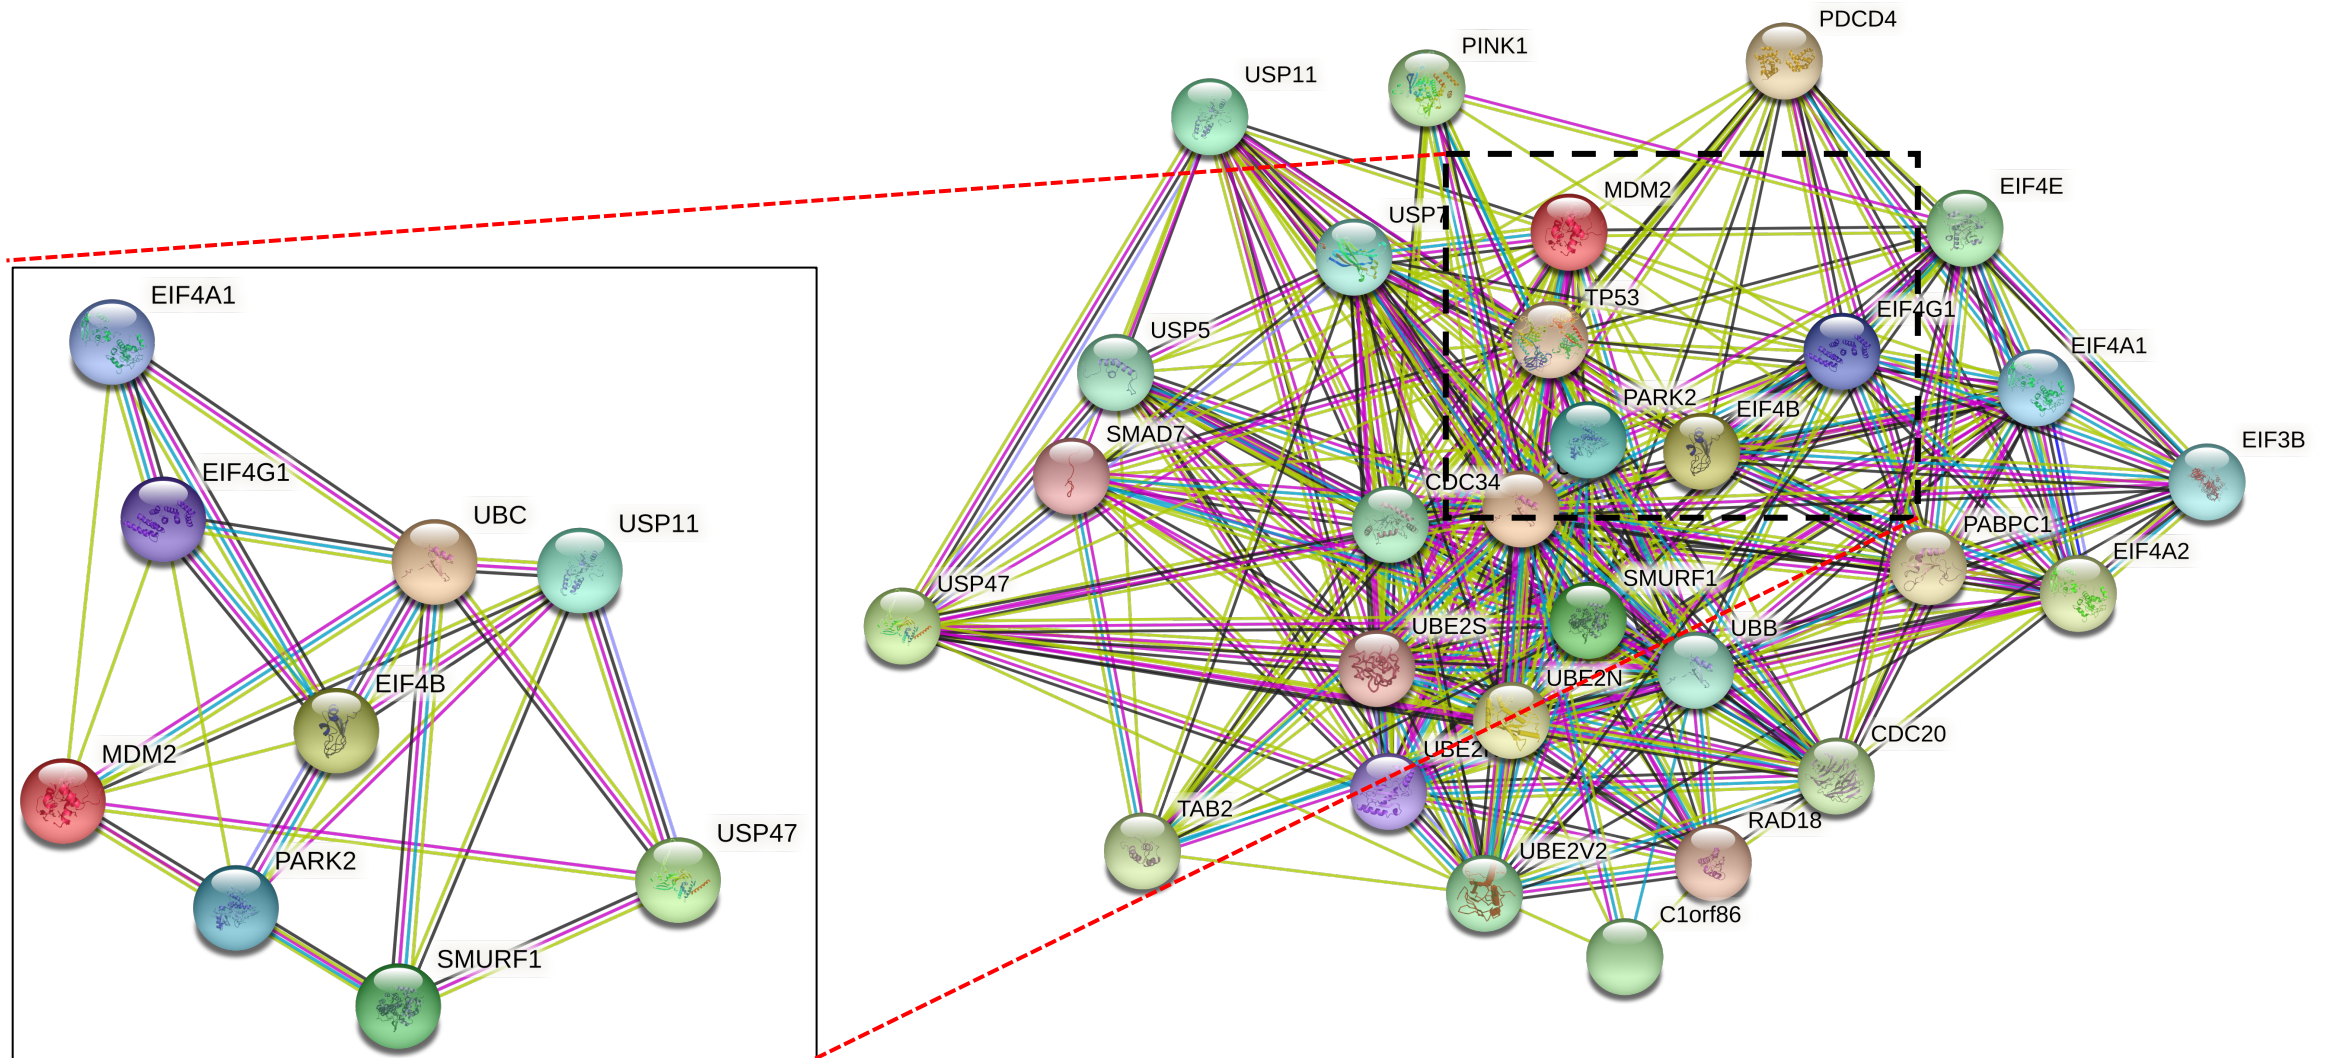

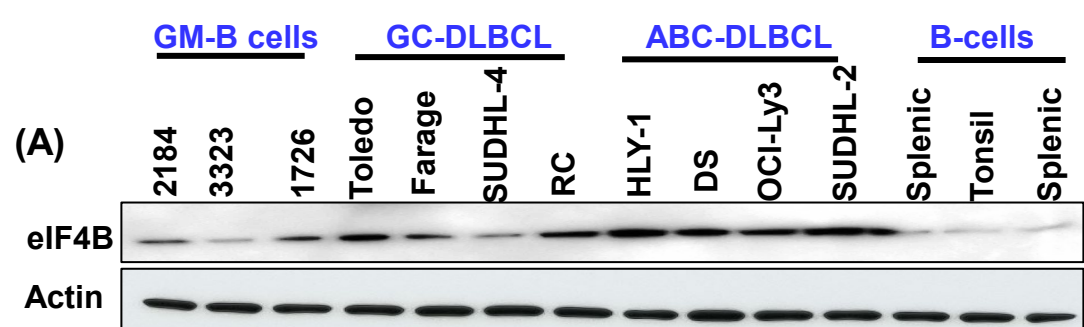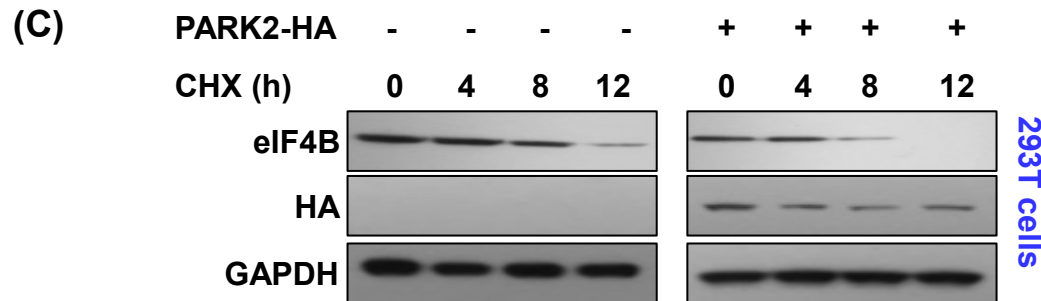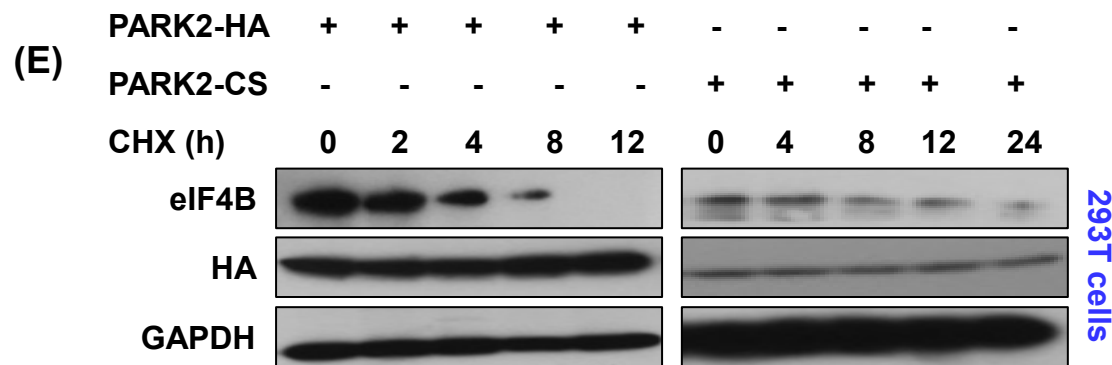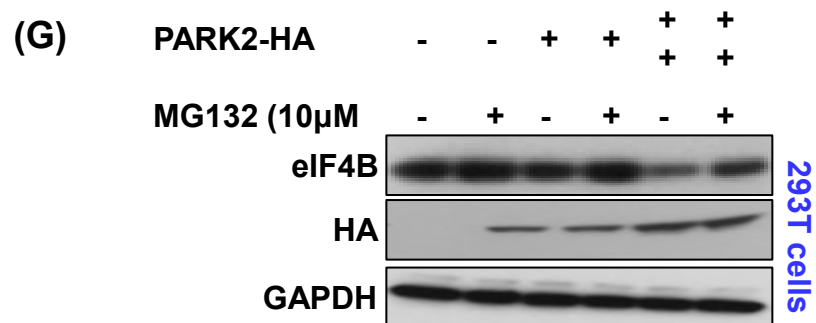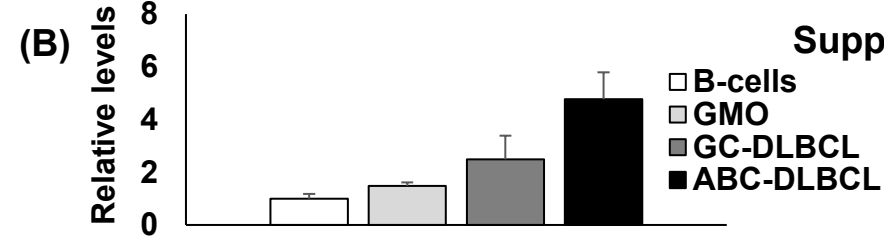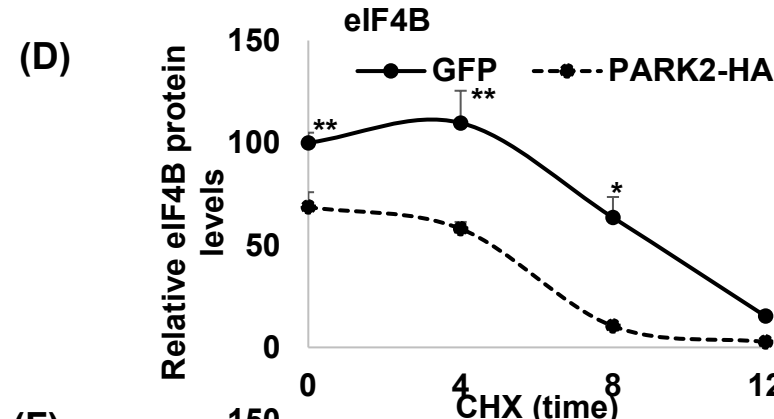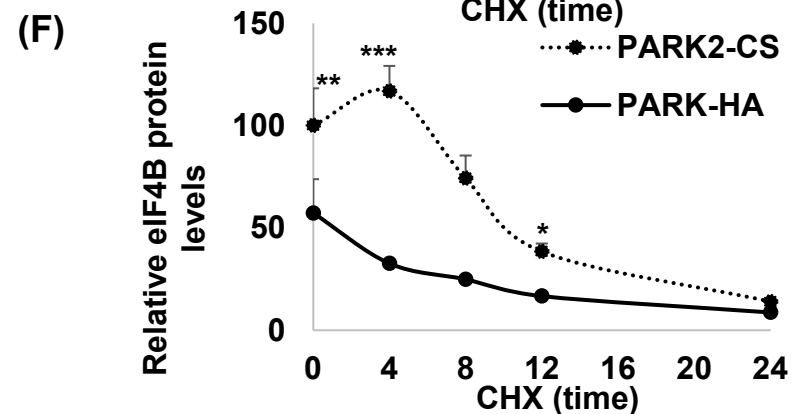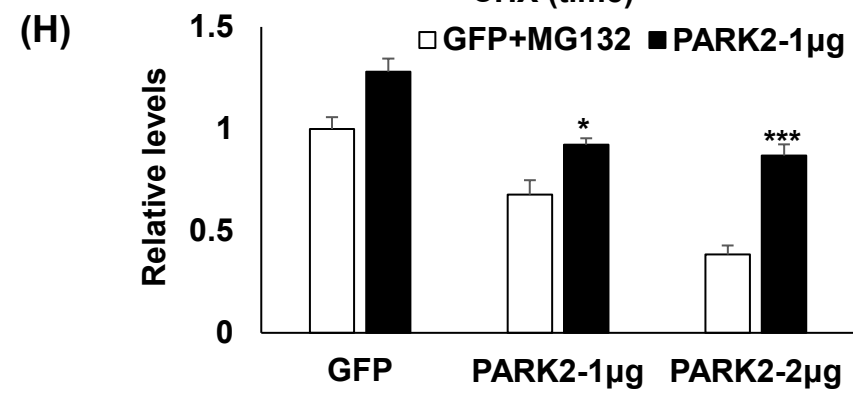

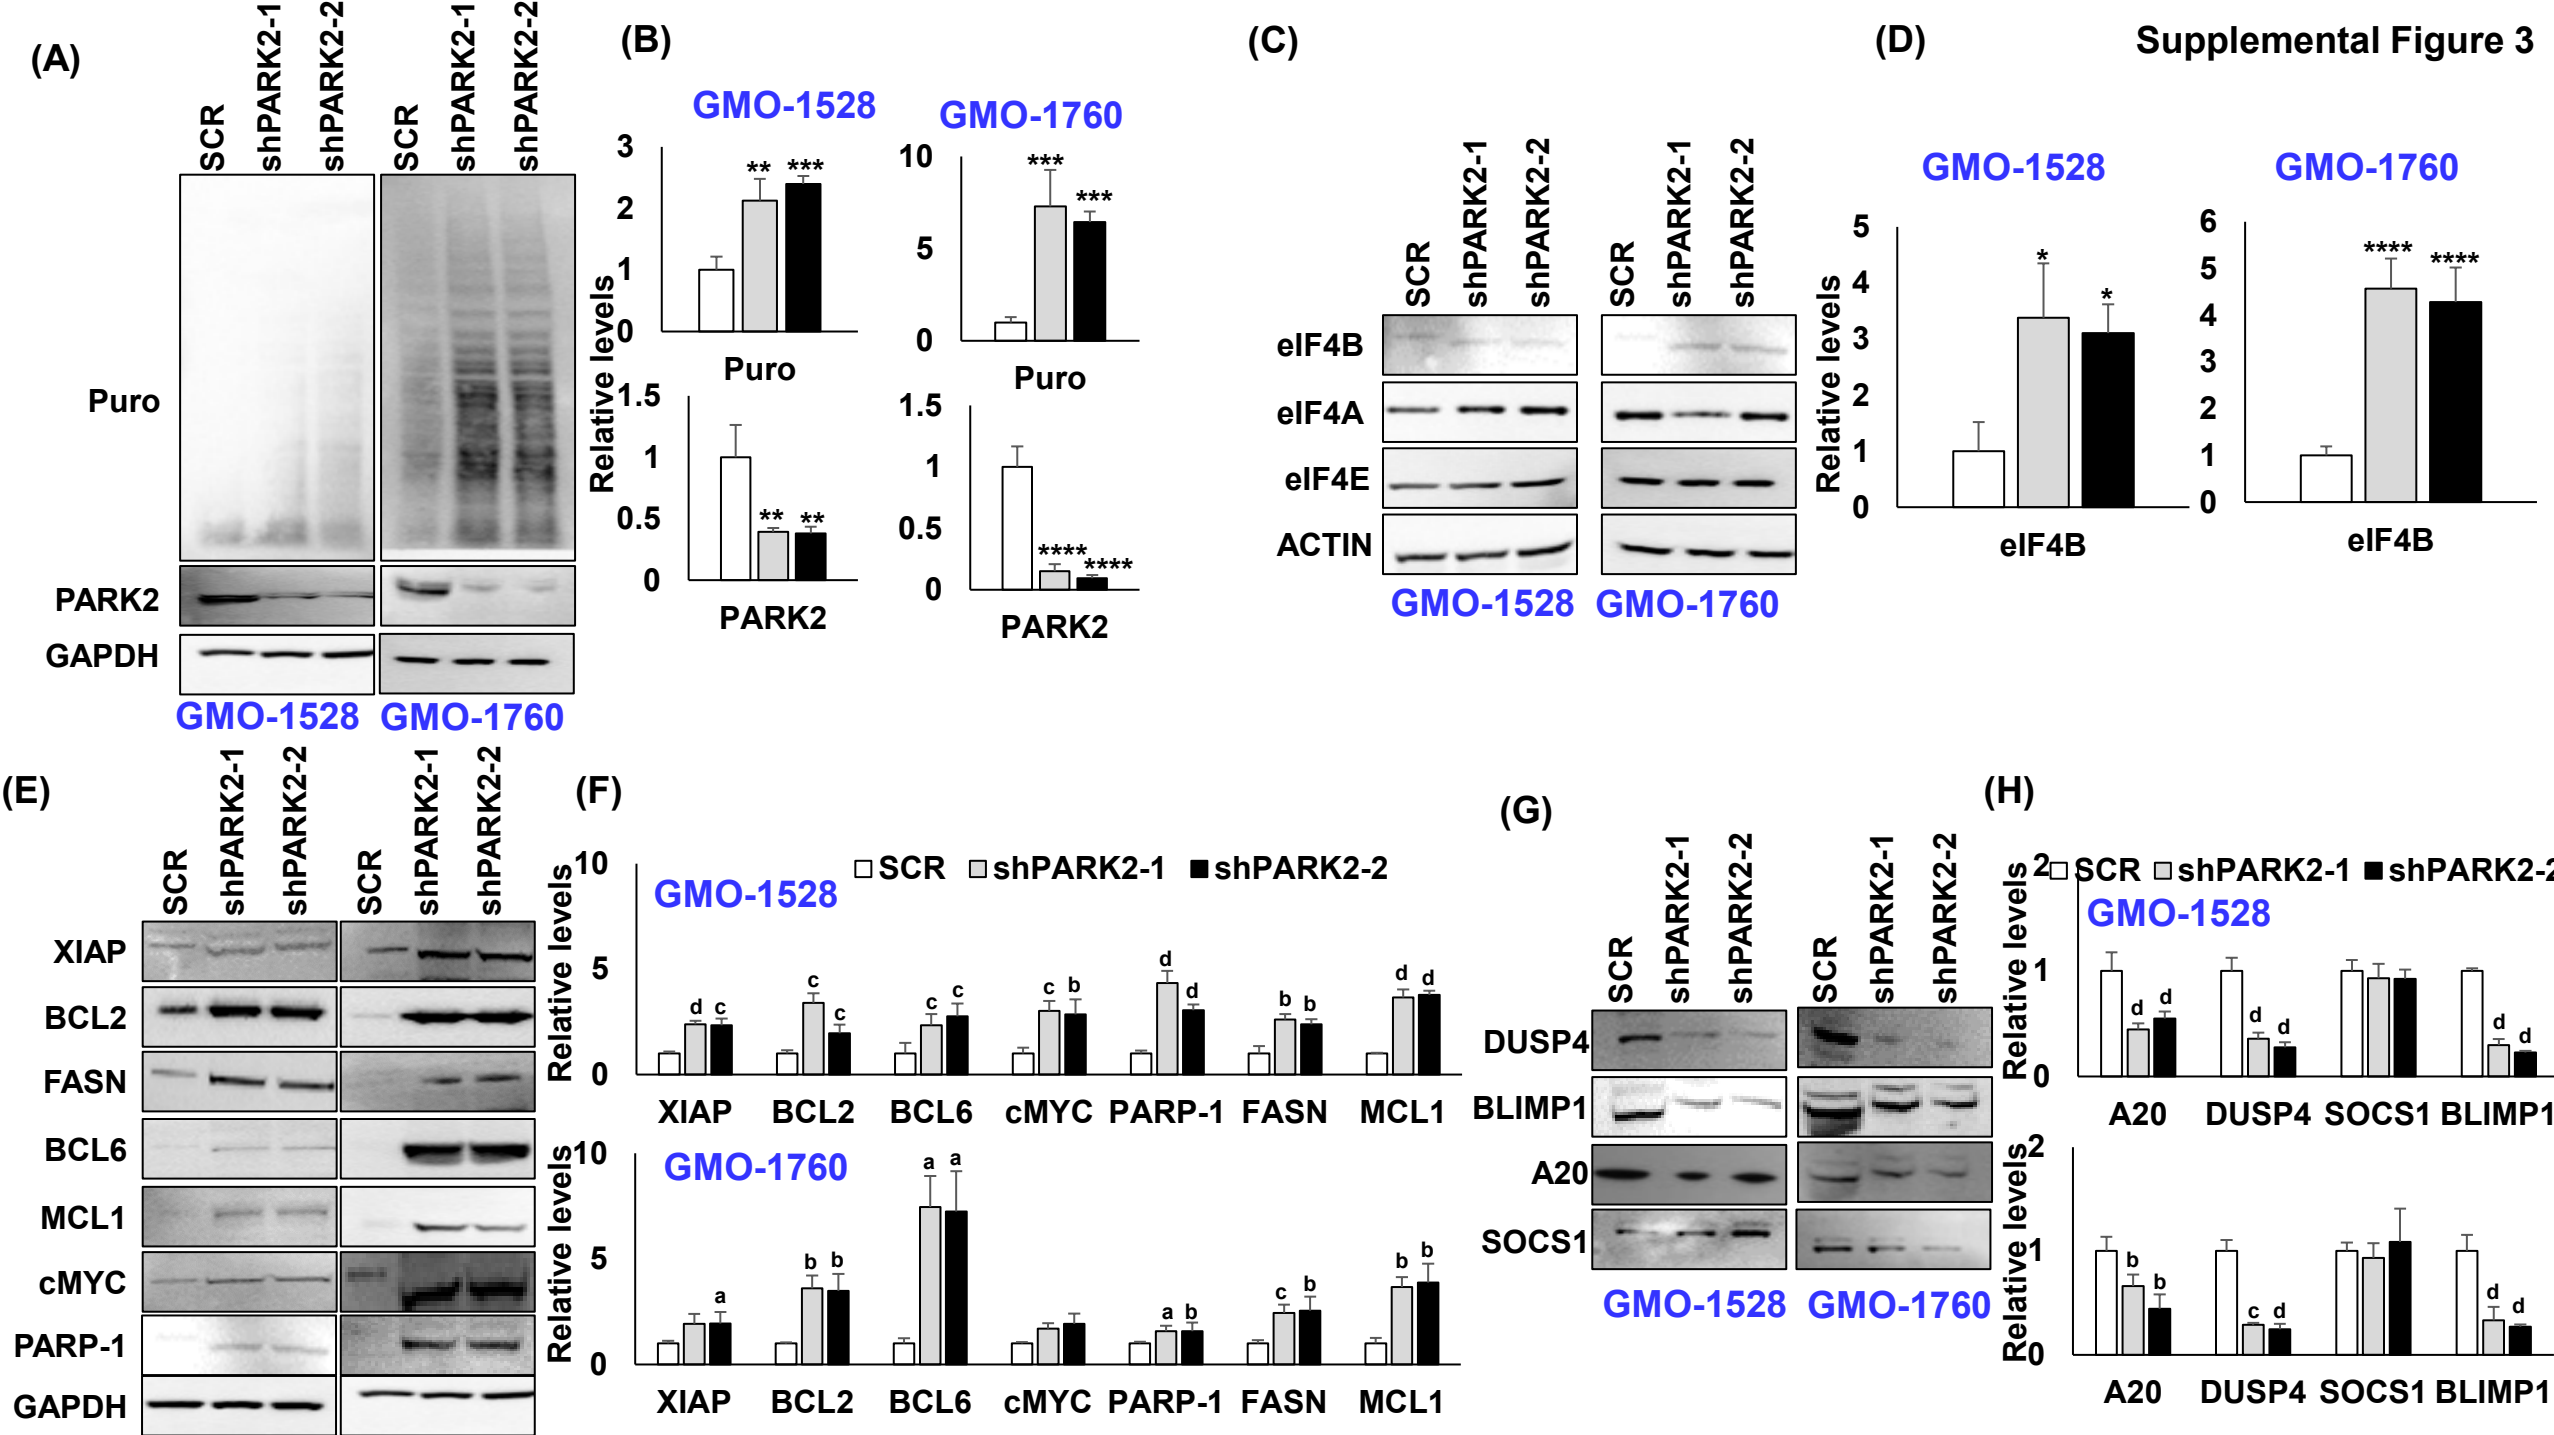

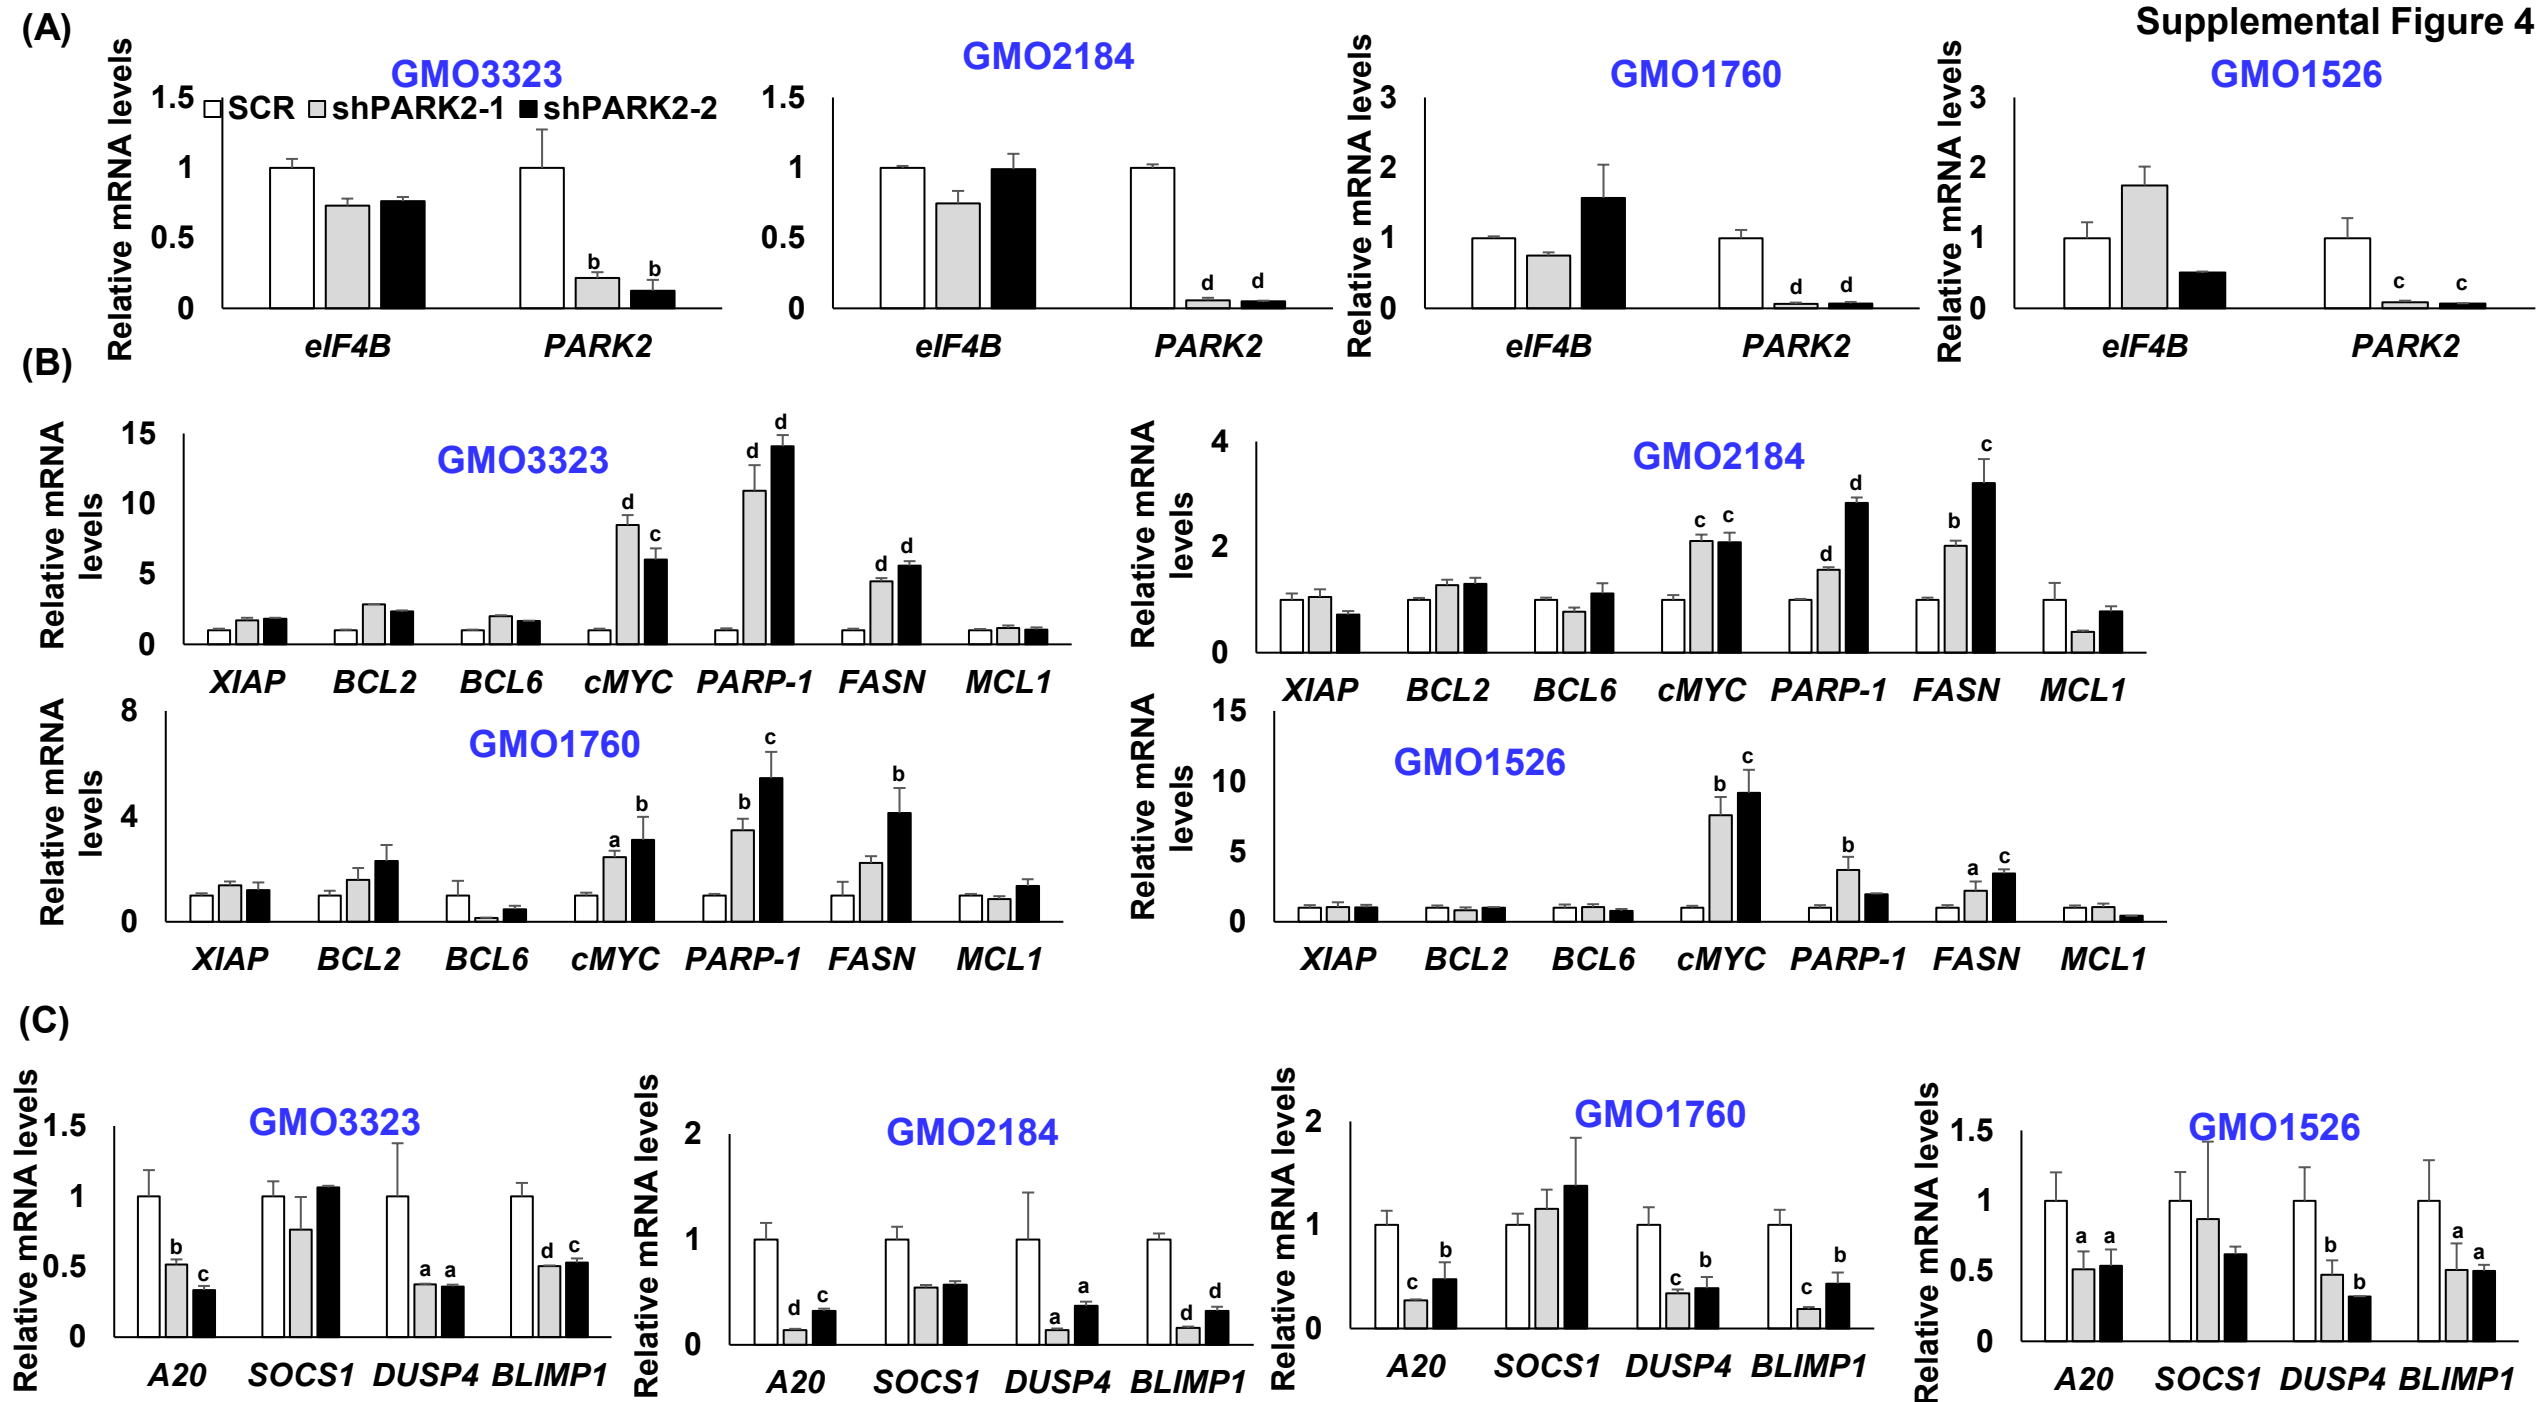

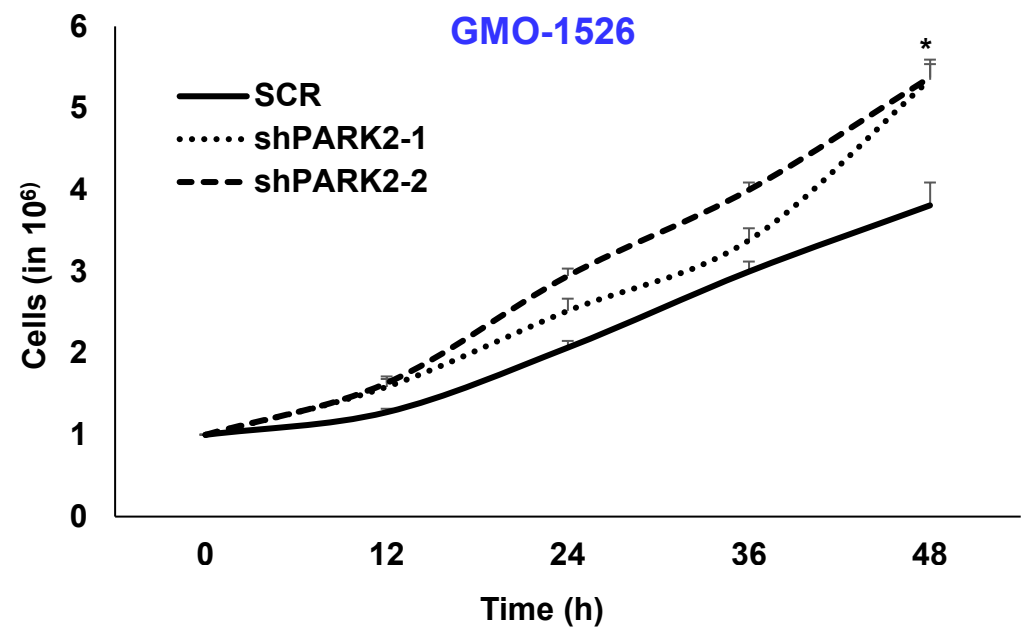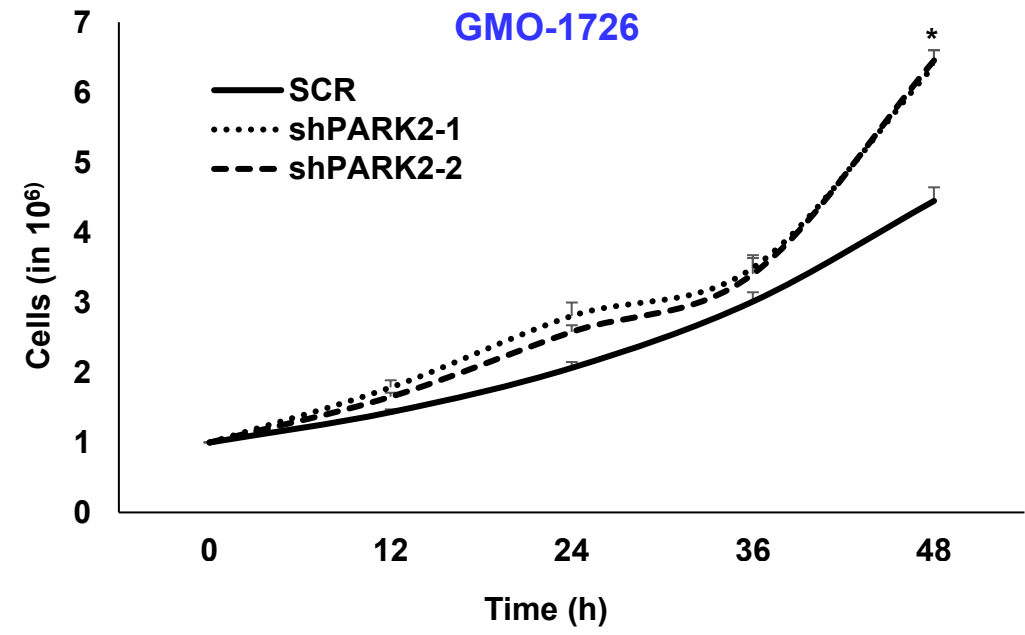

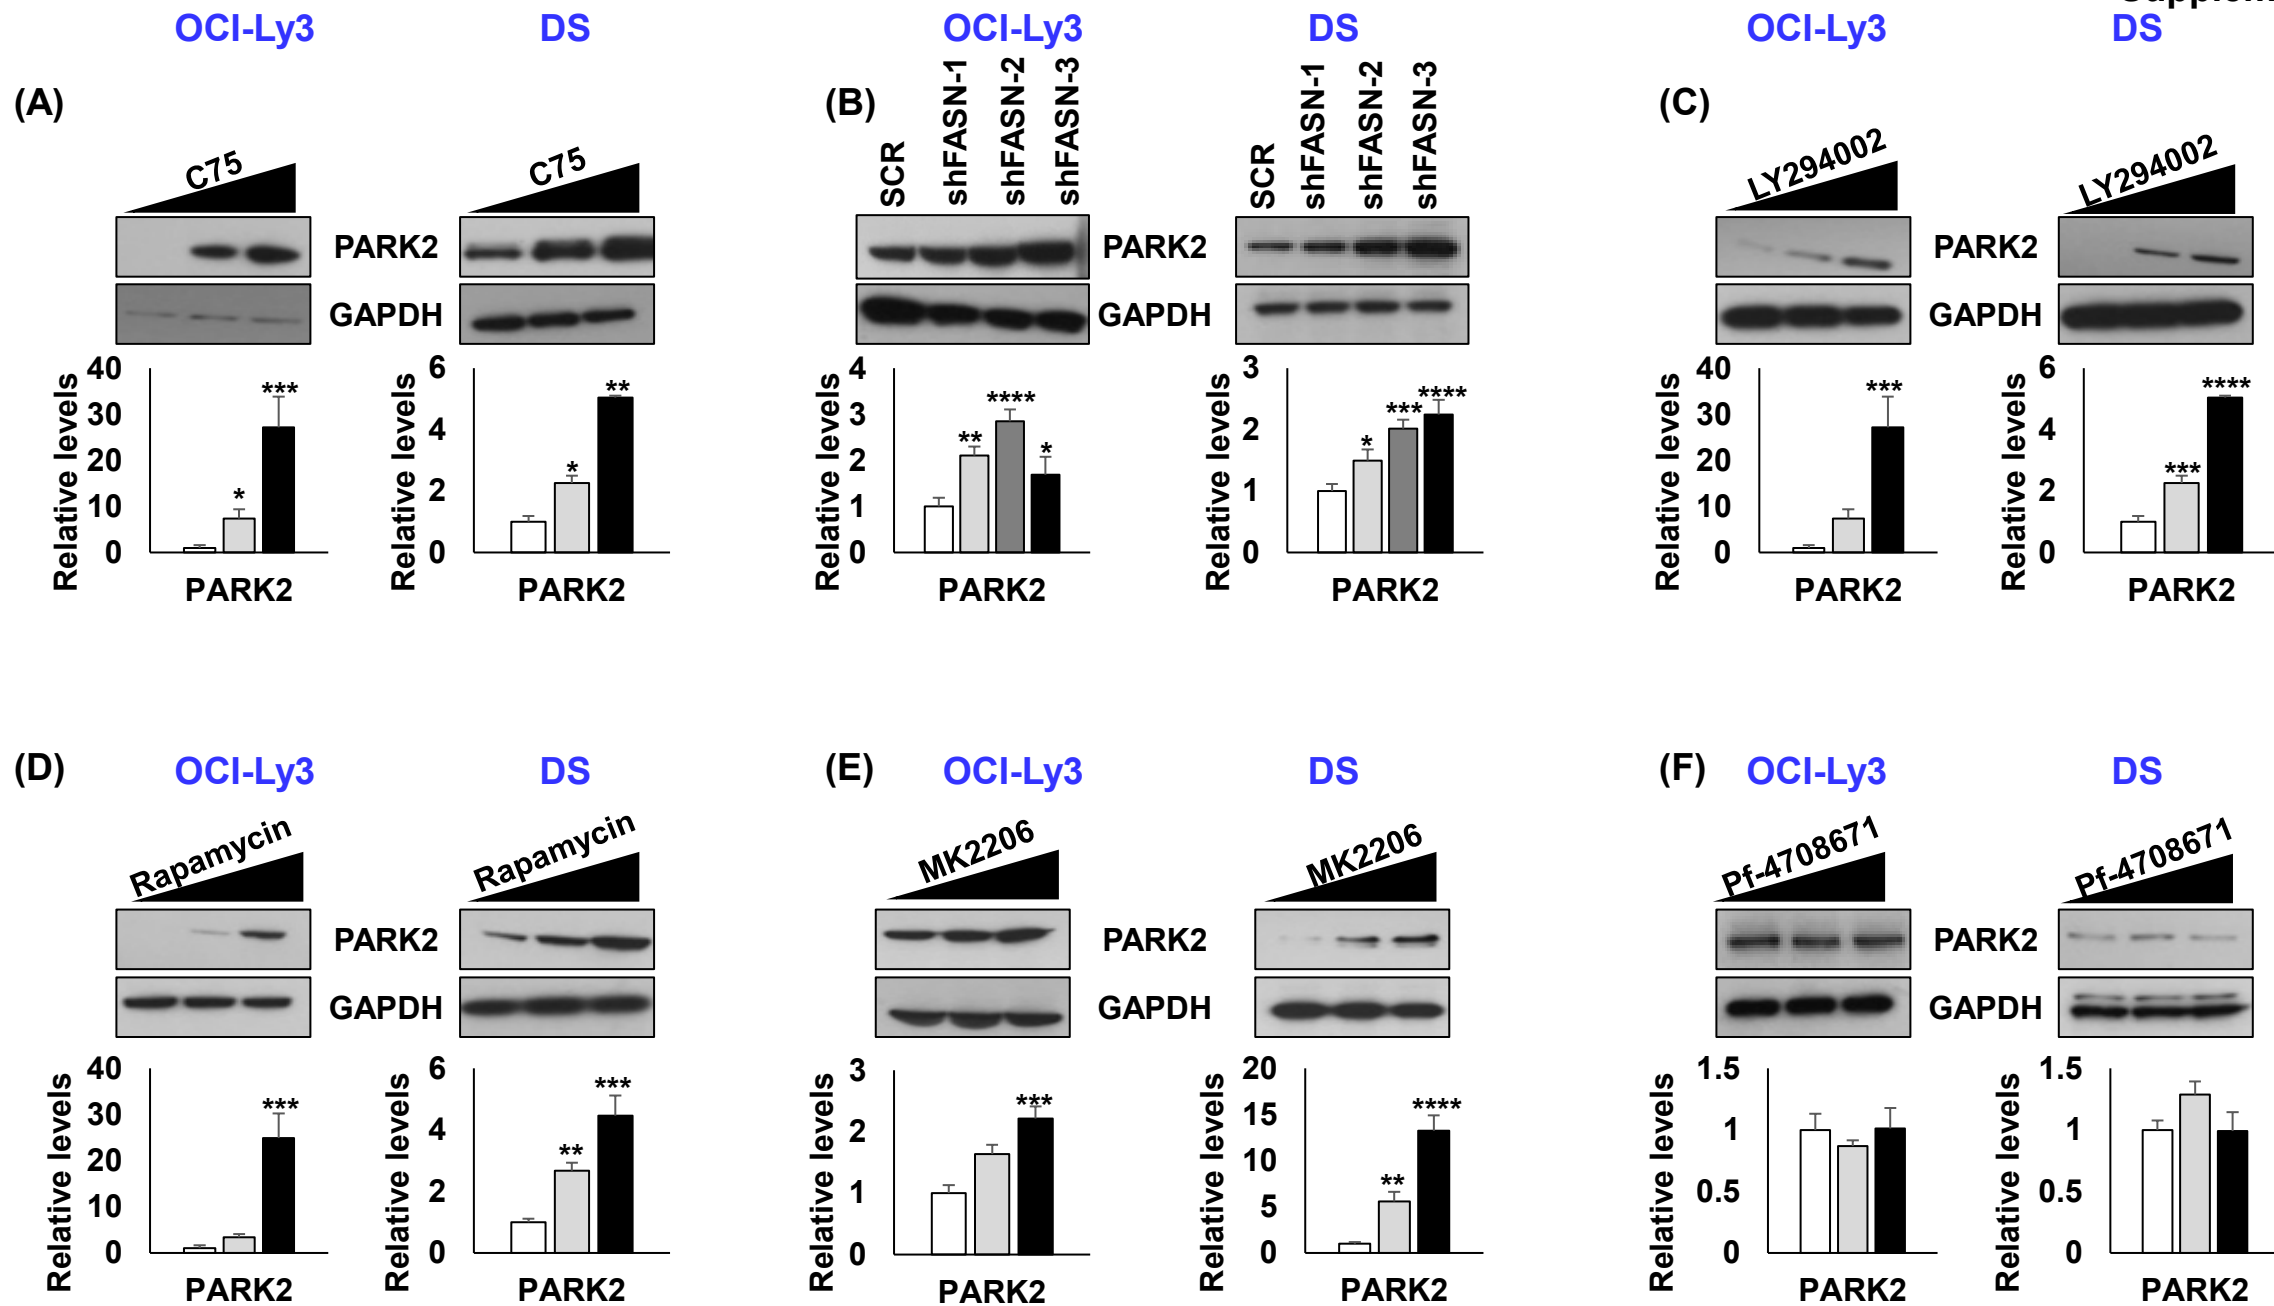

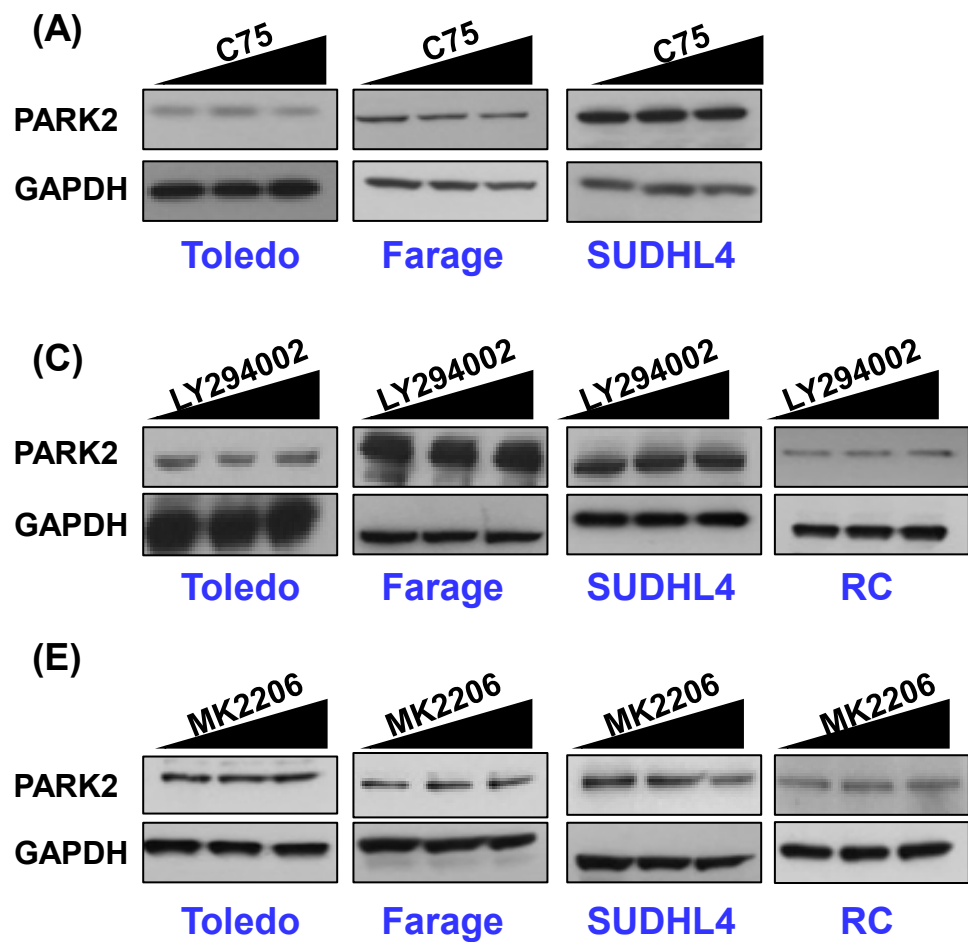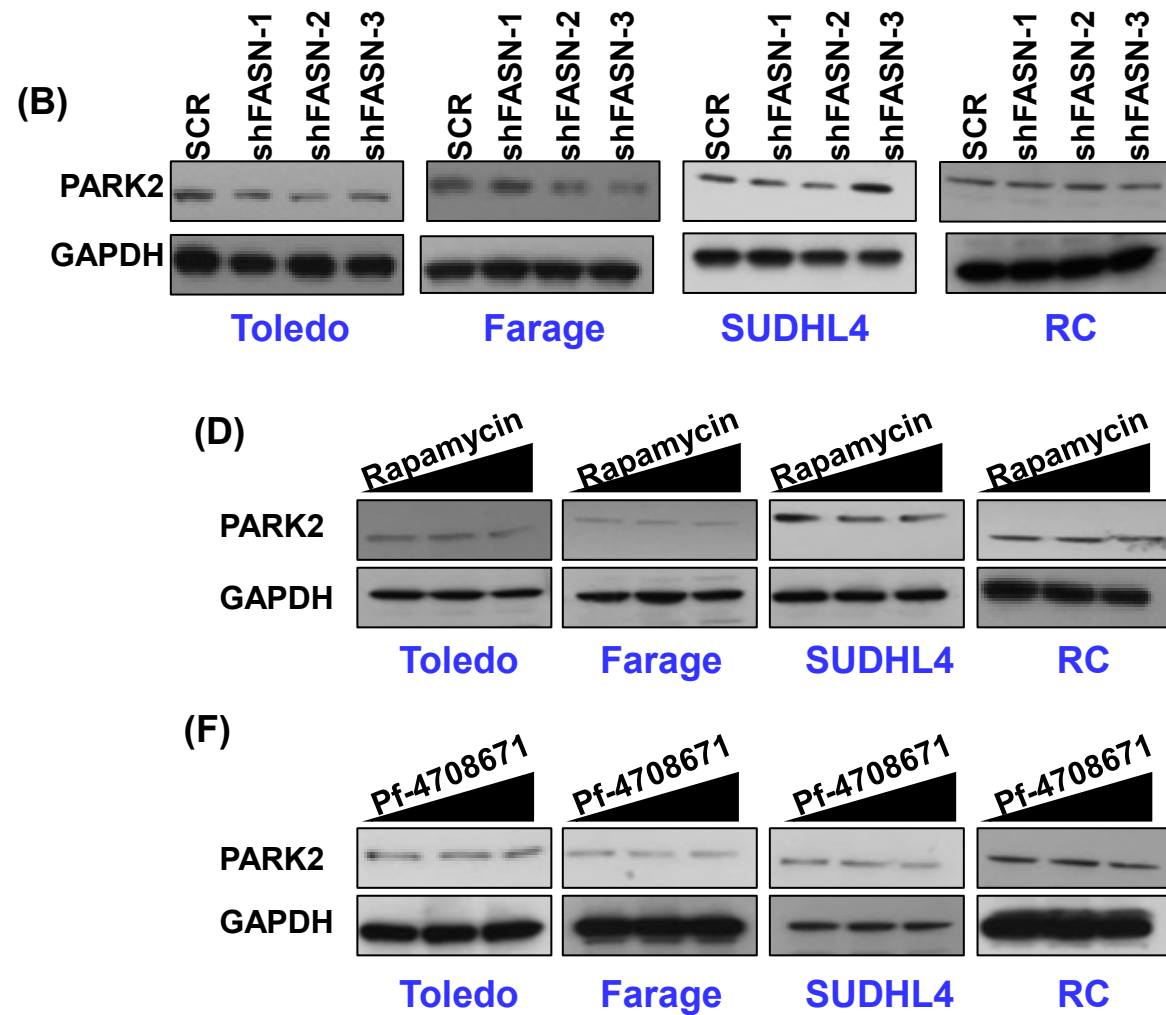

(A)

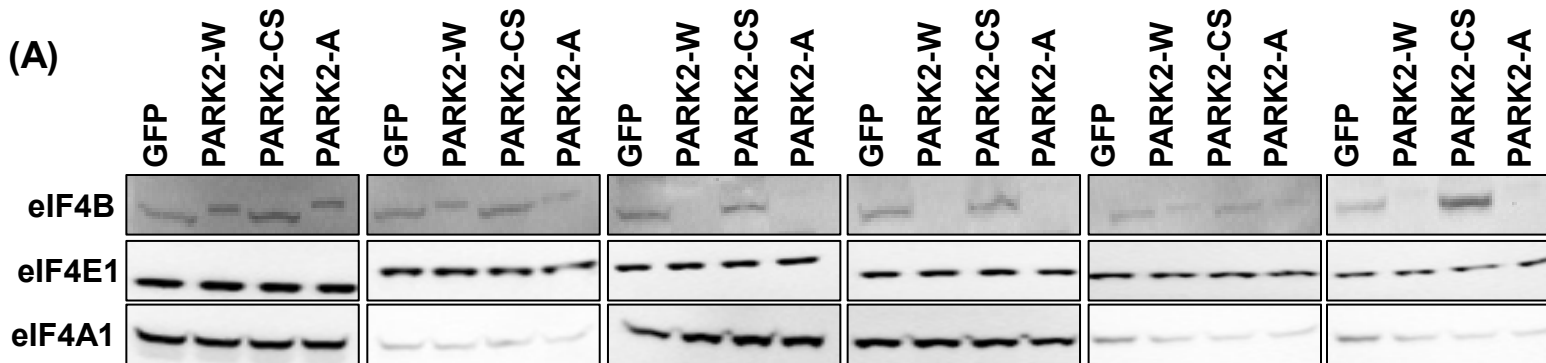

(B)

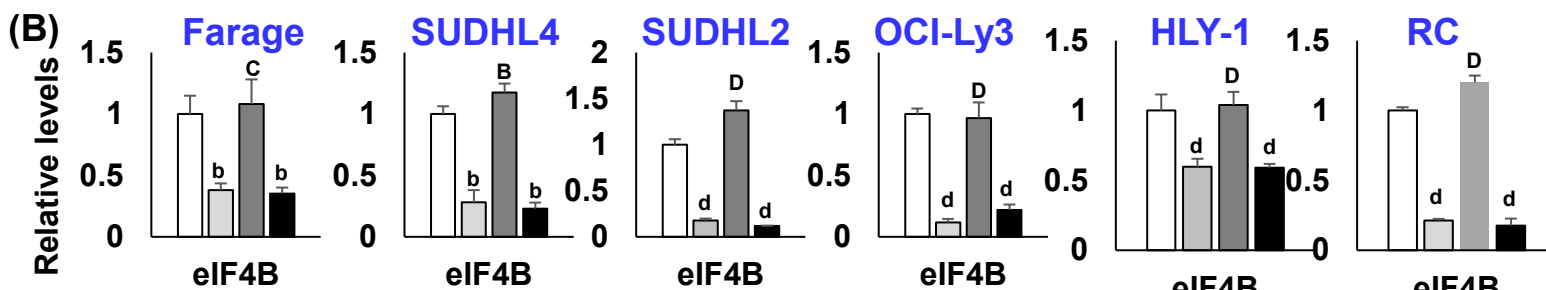

(C)

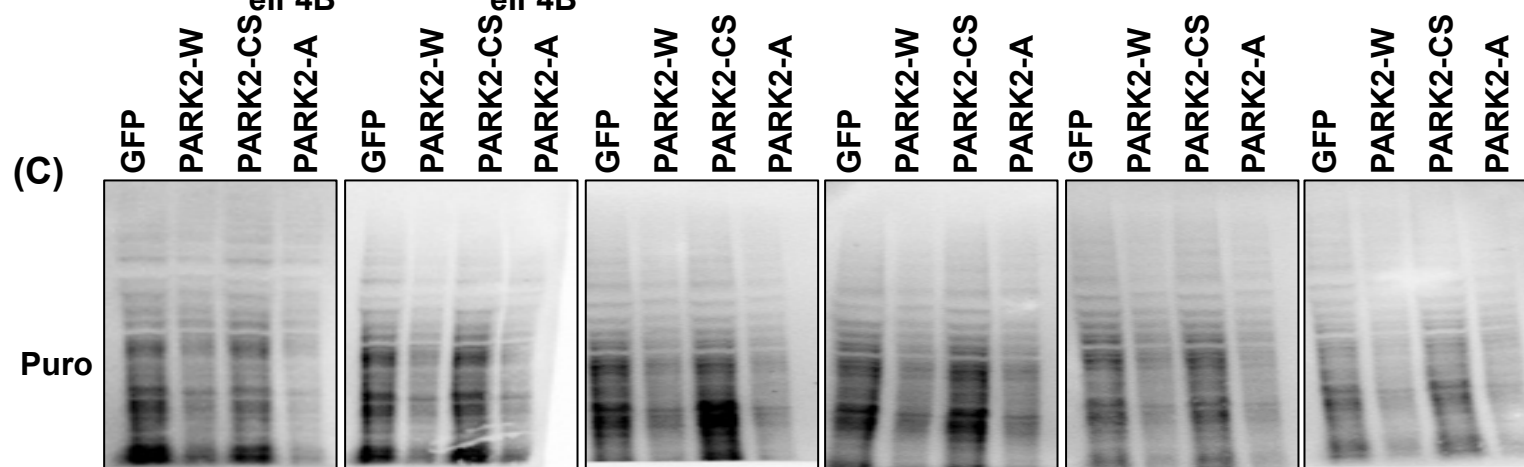

(D)

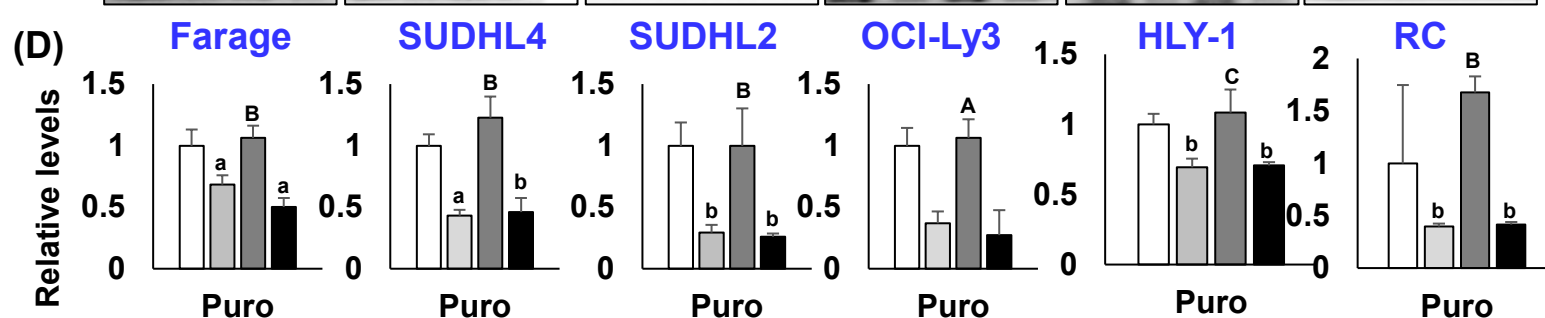



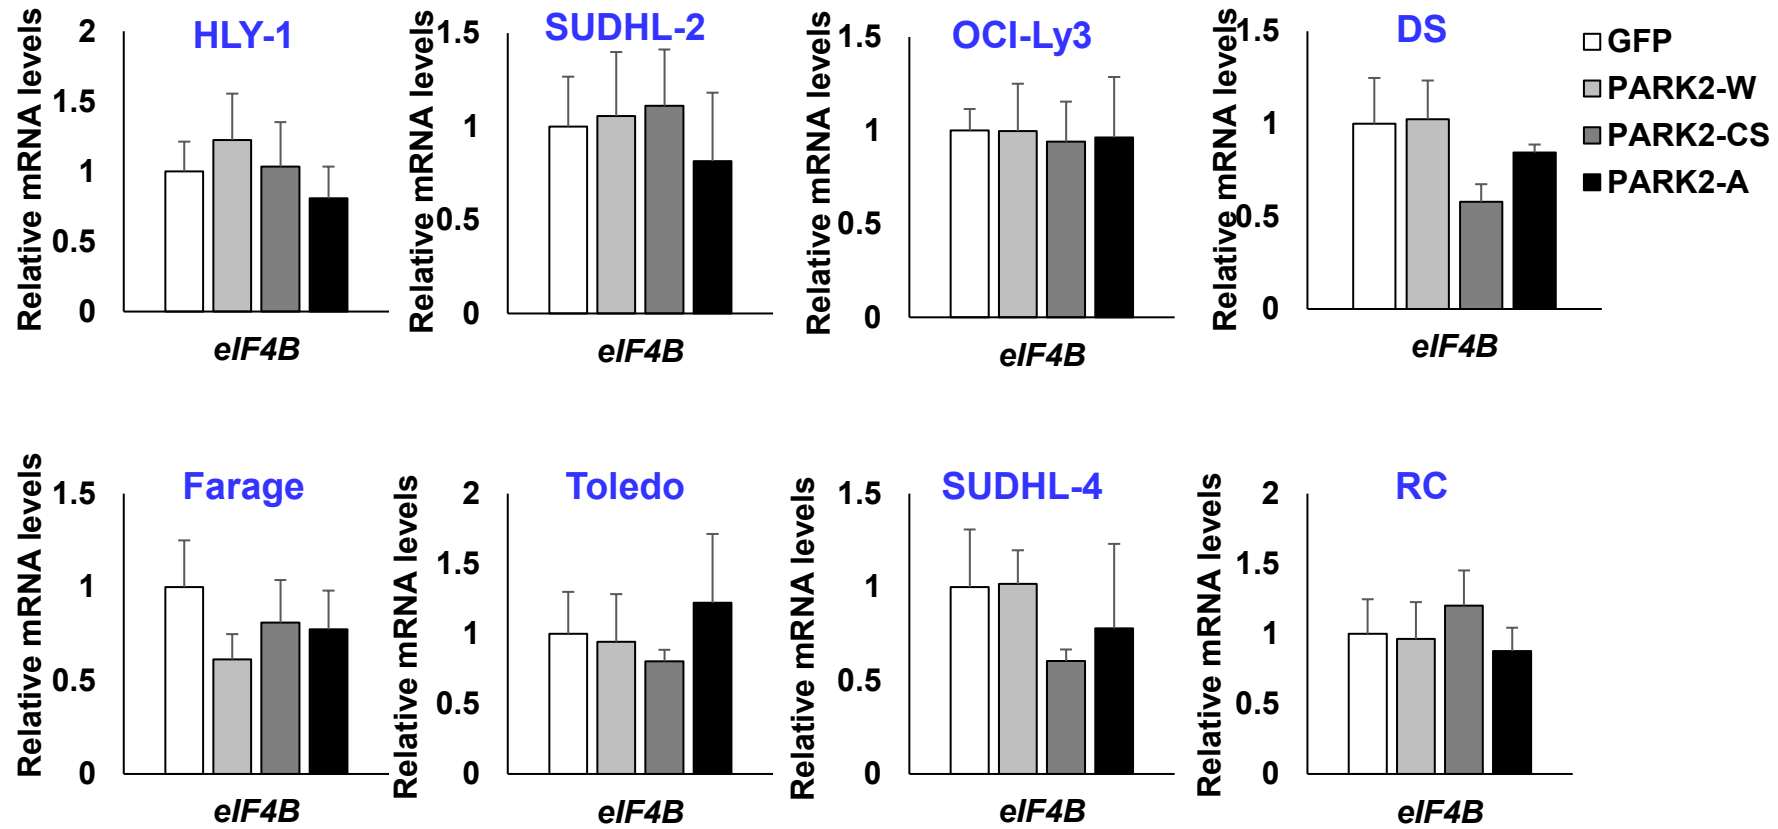

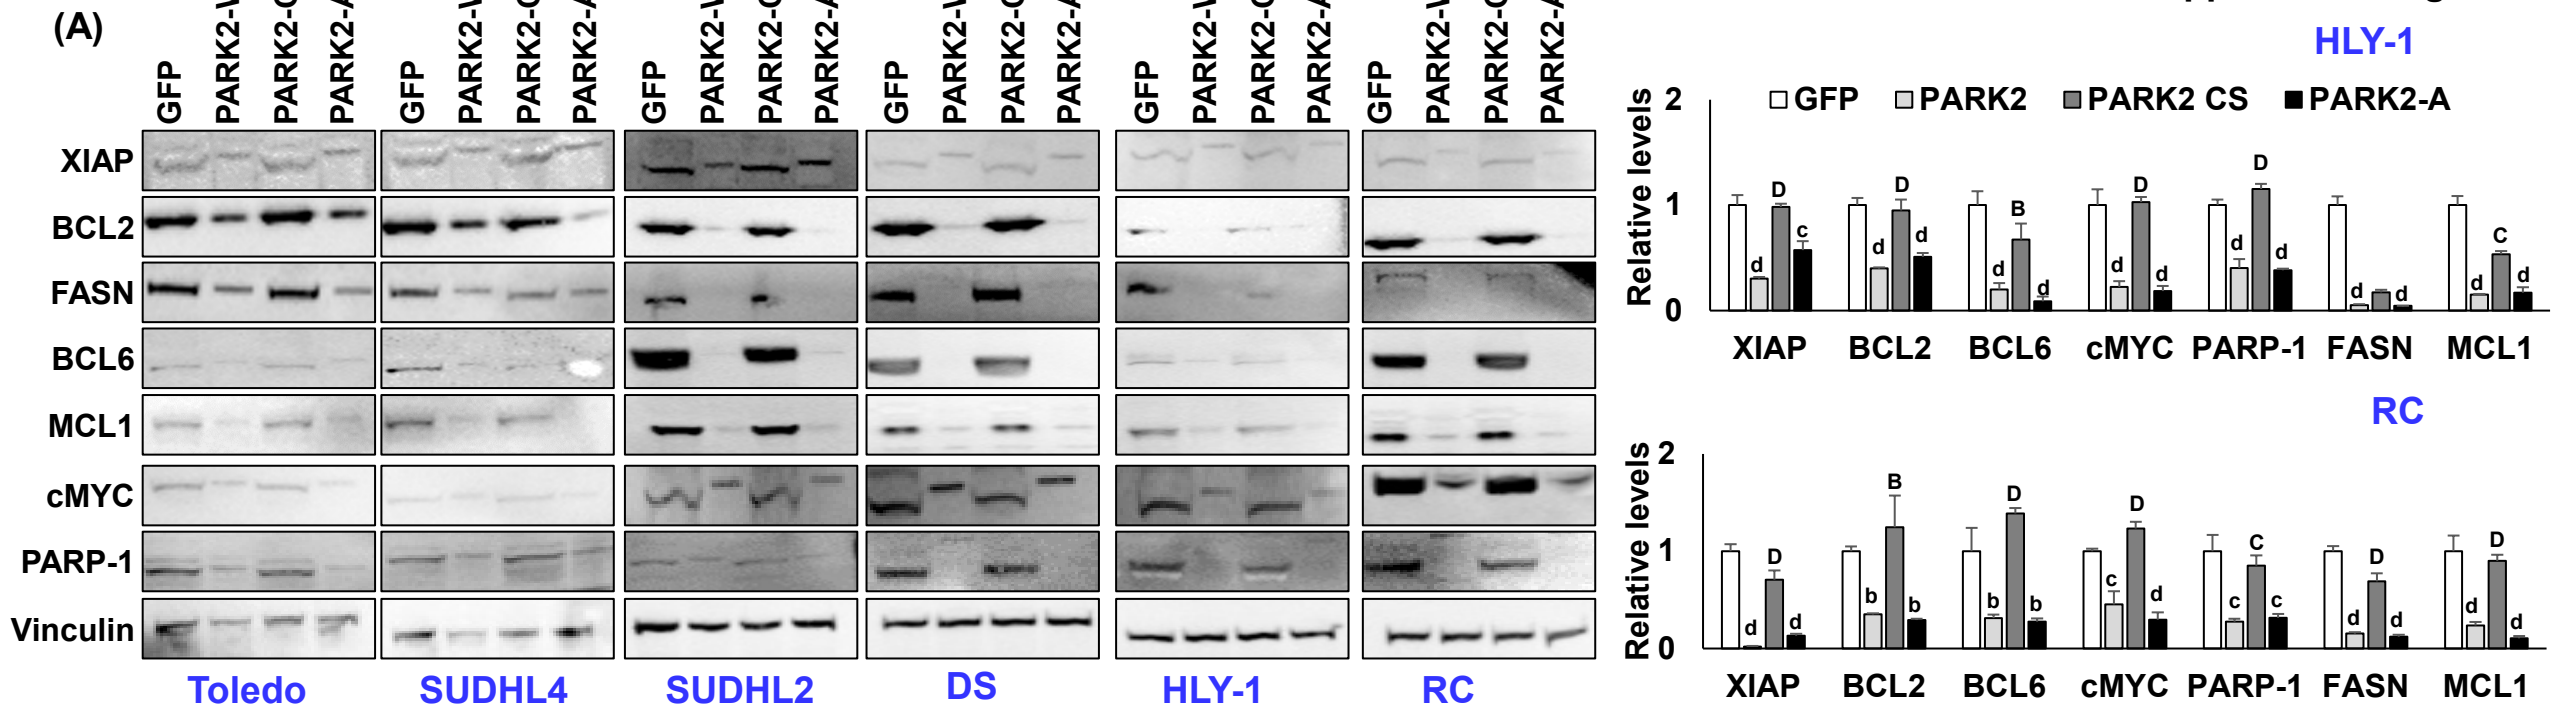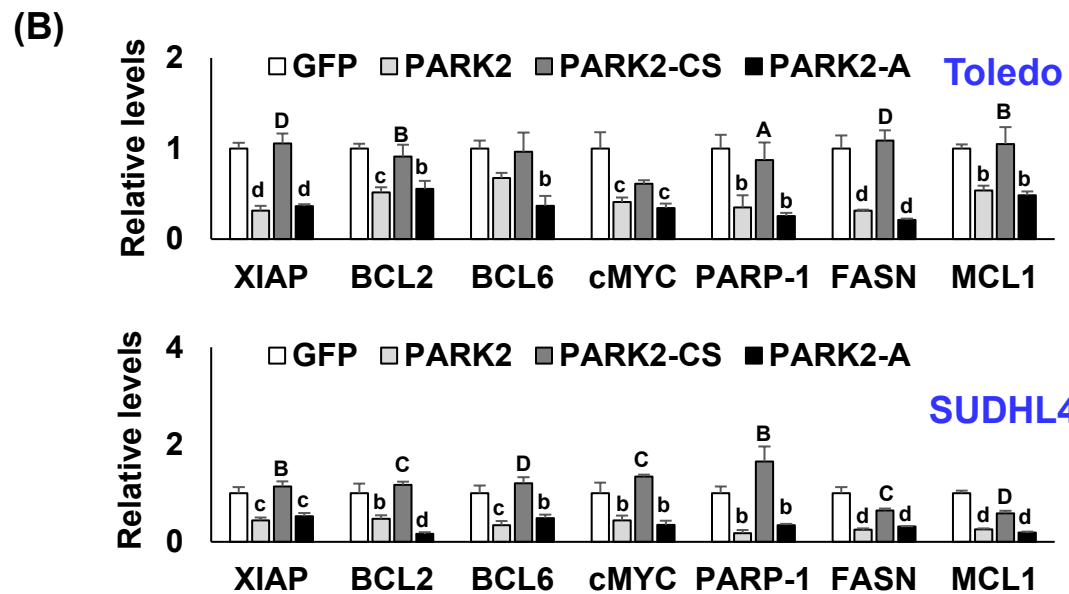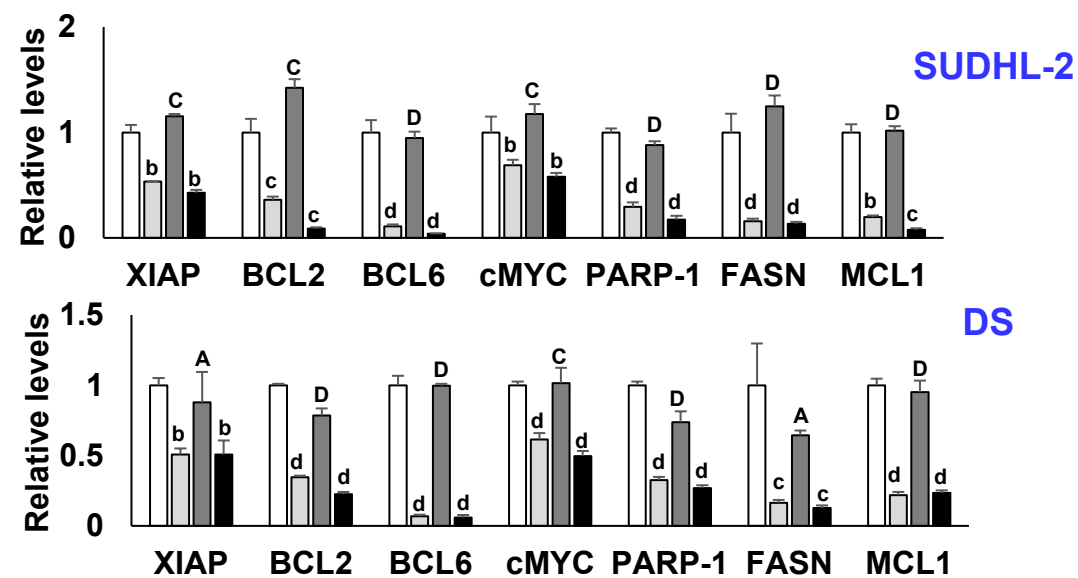

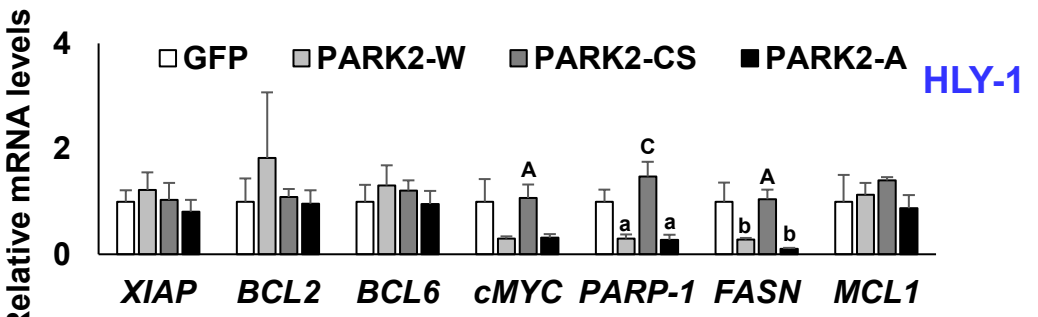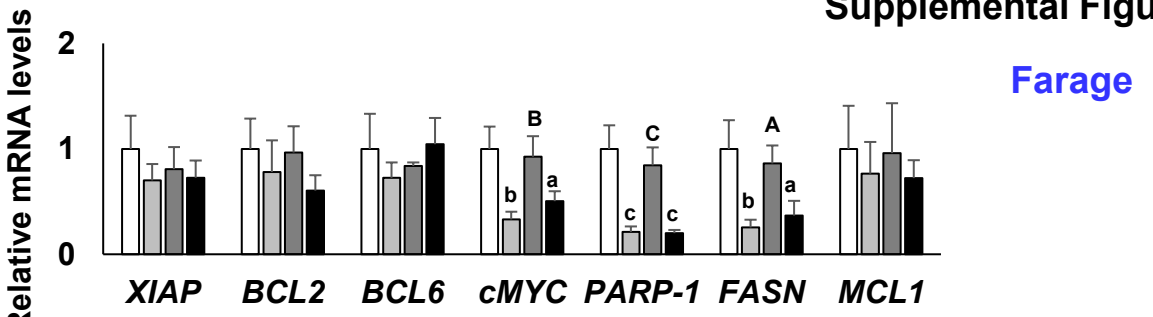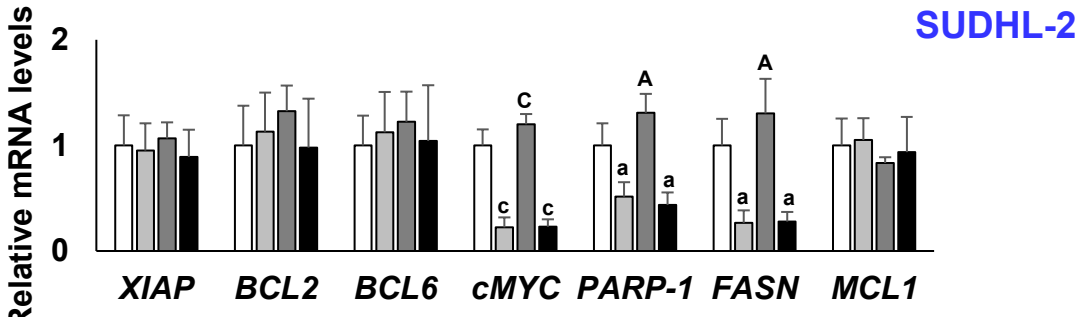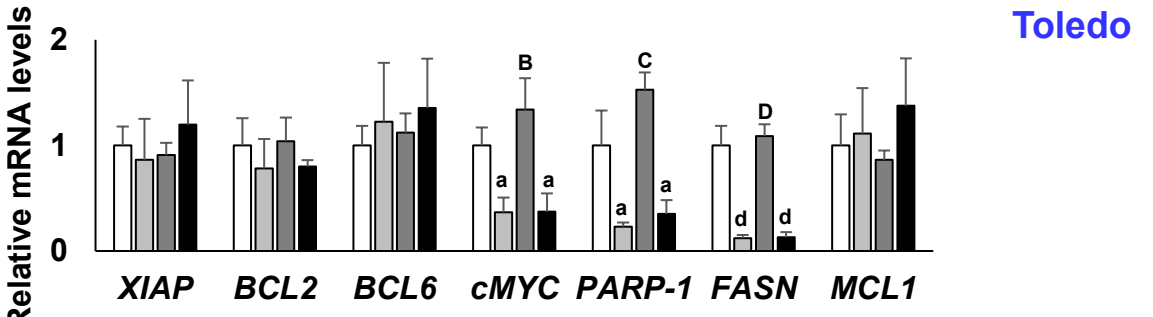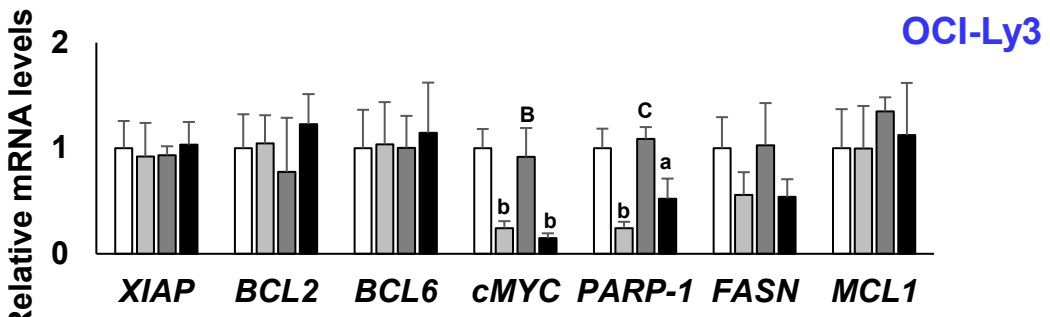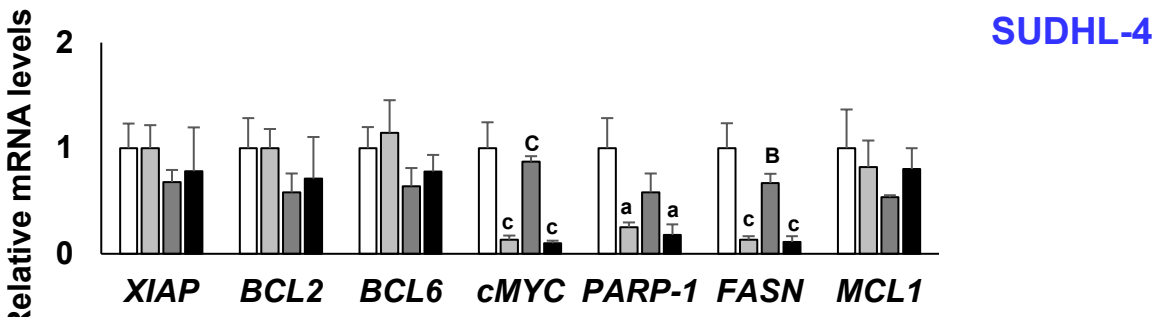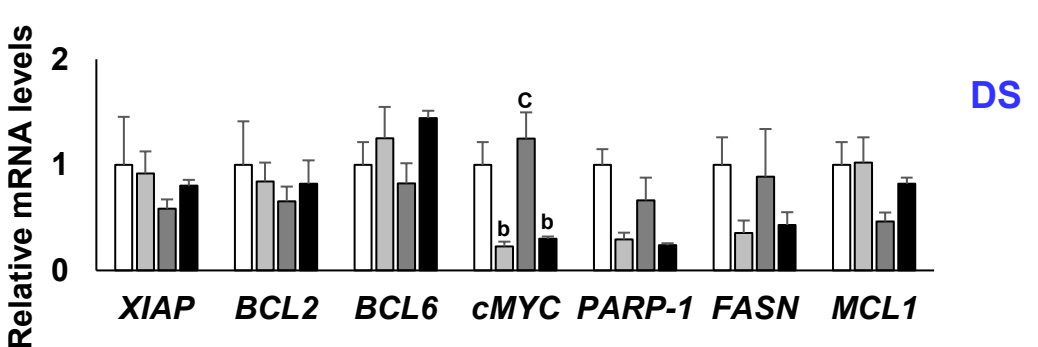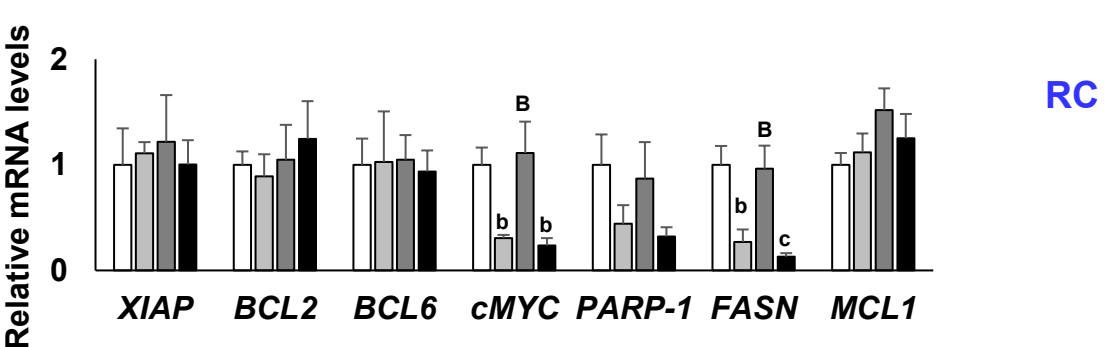

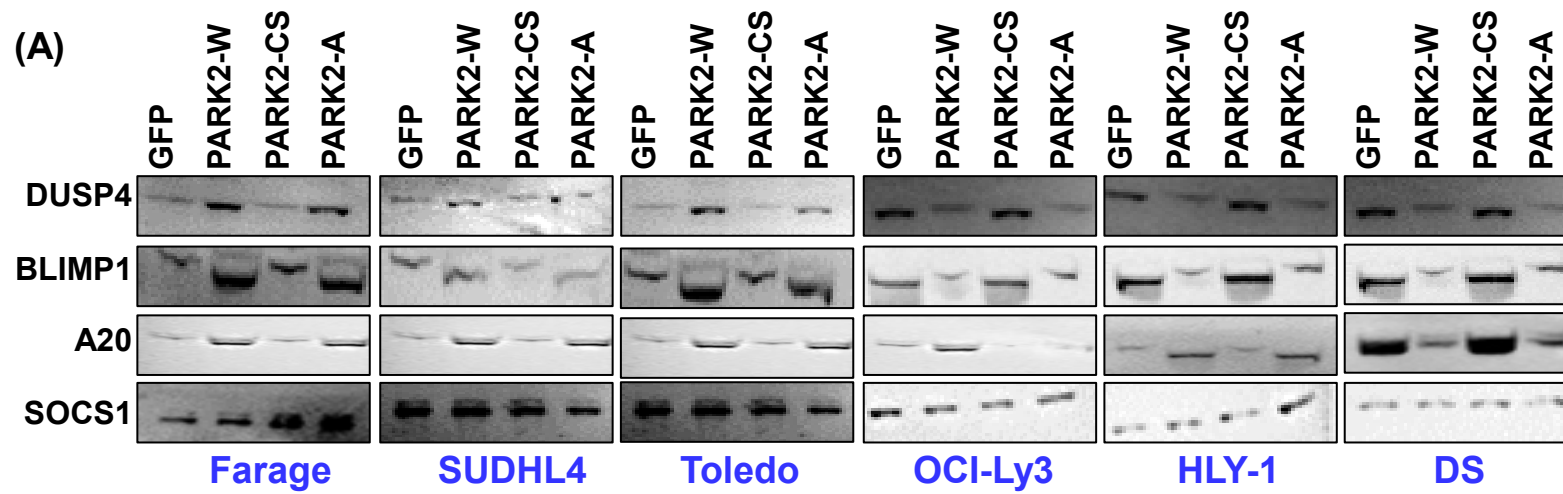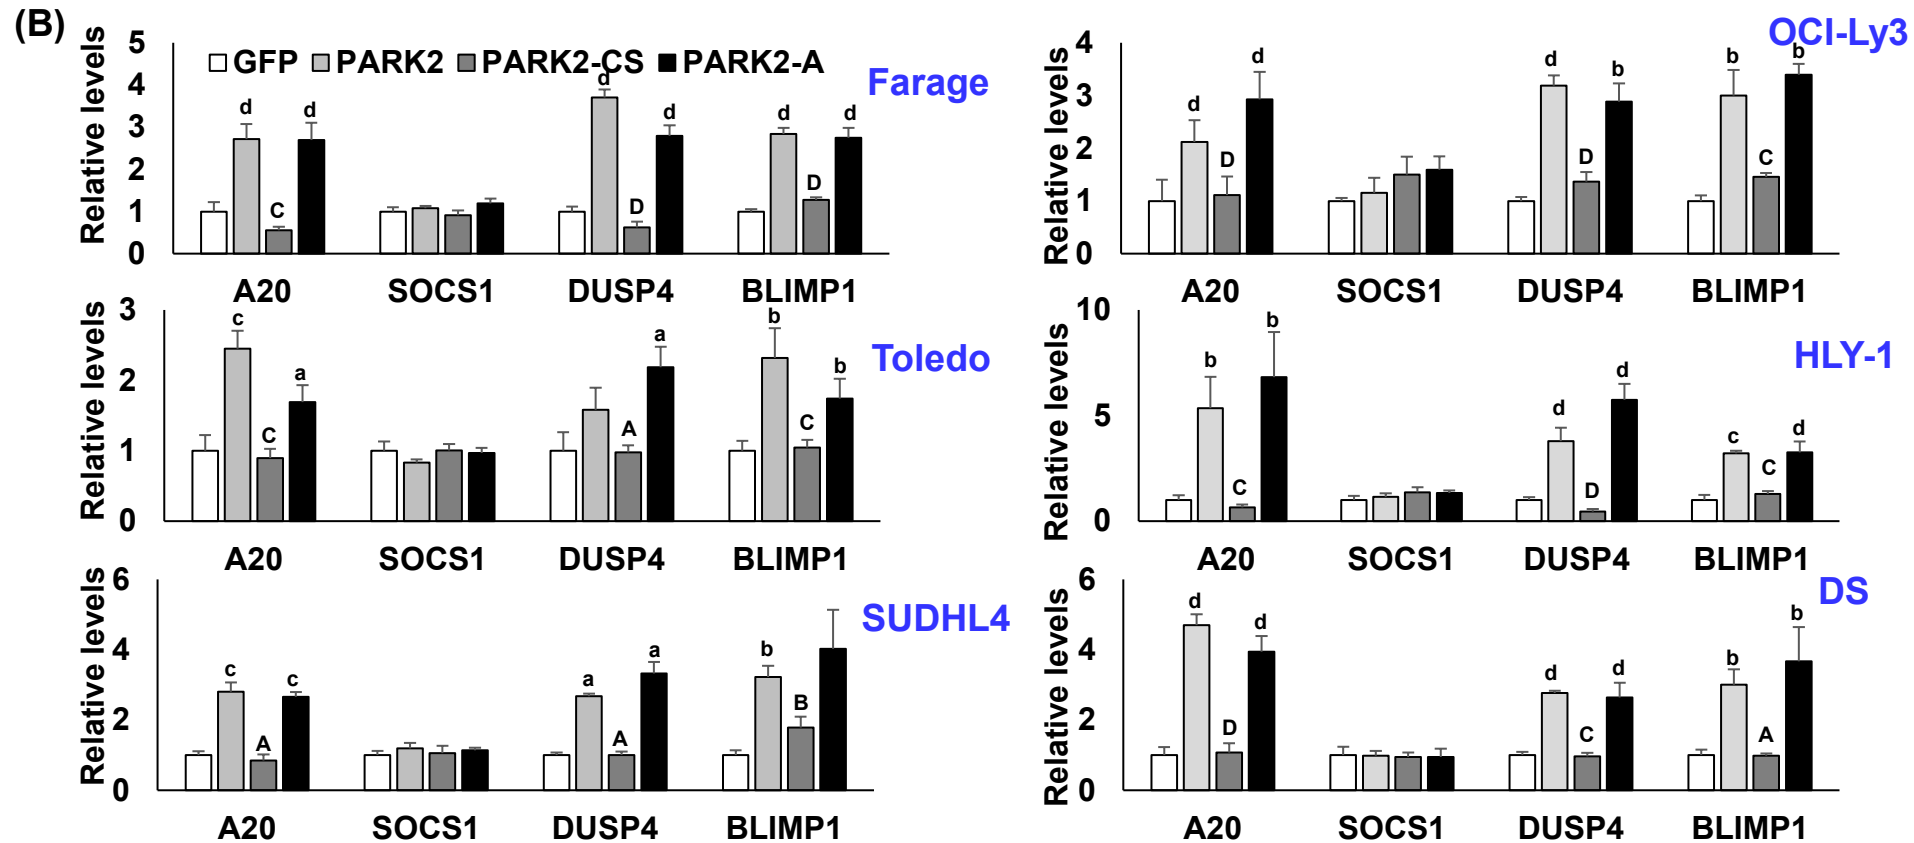

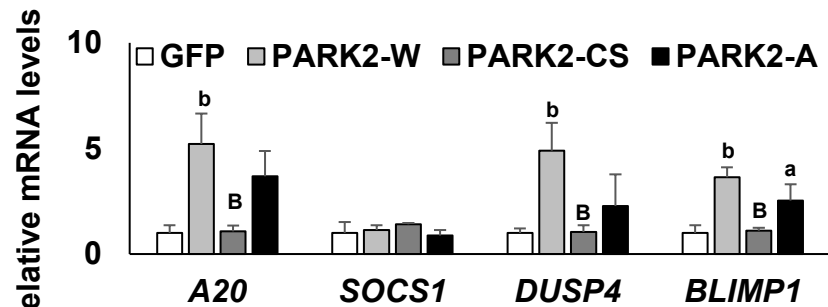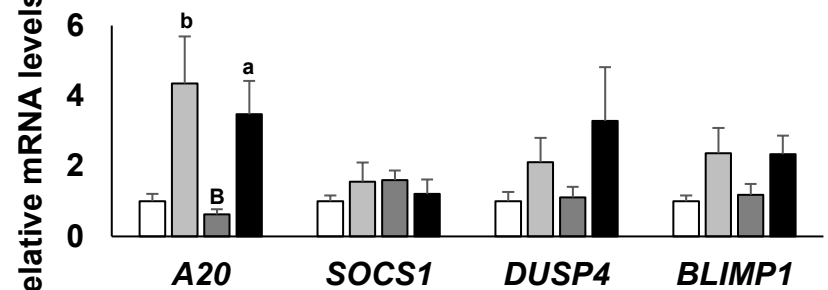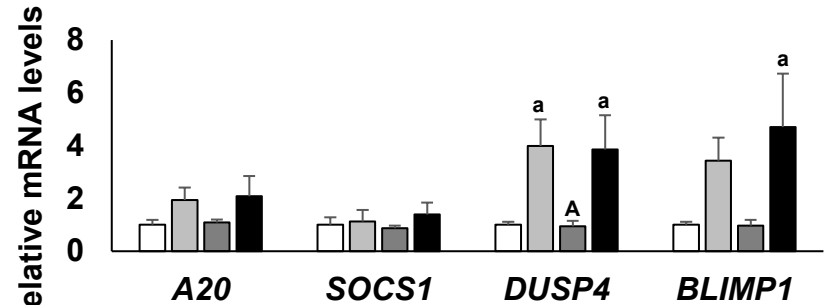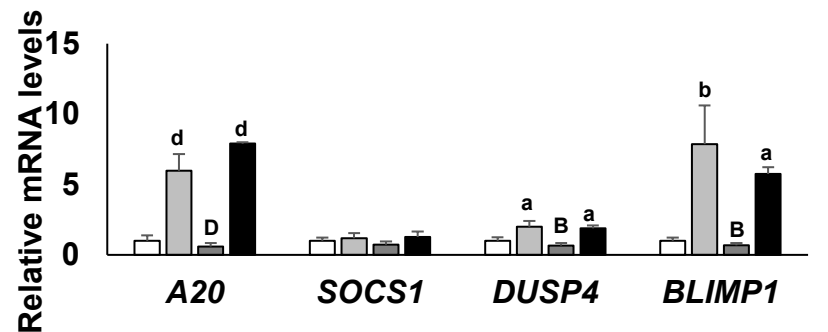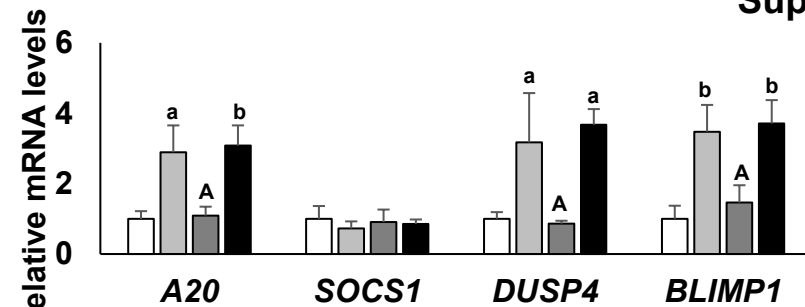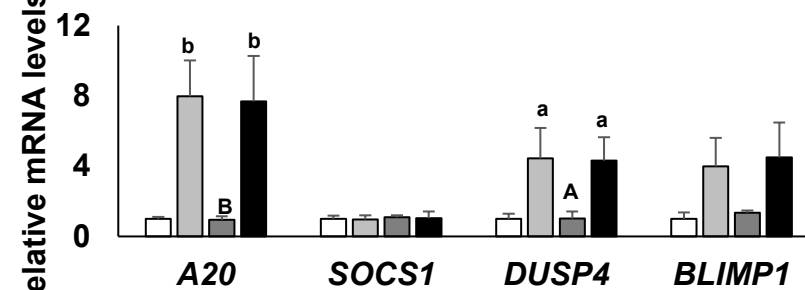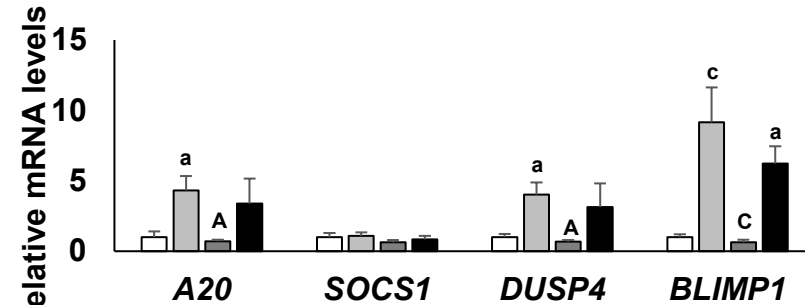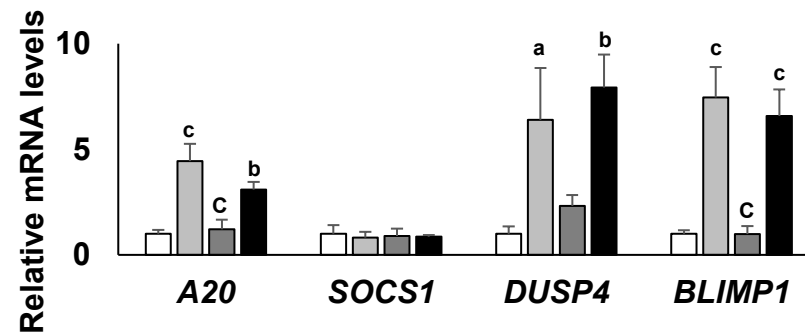

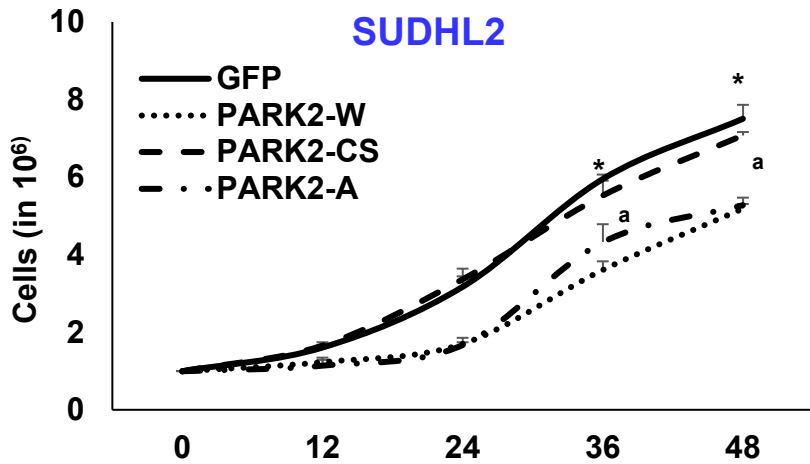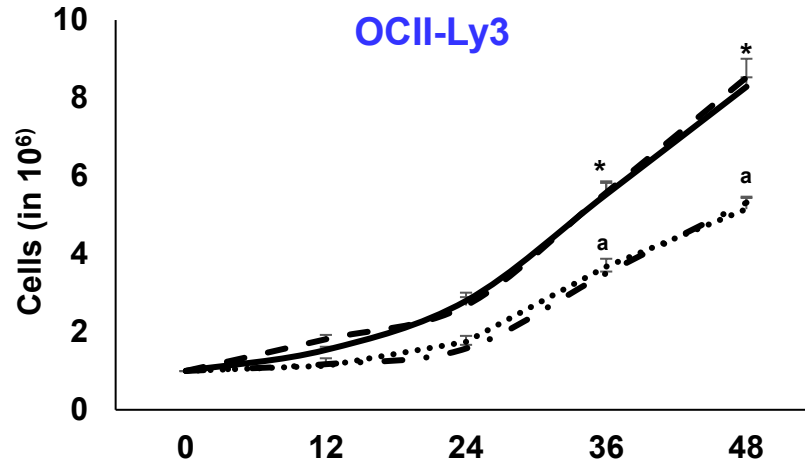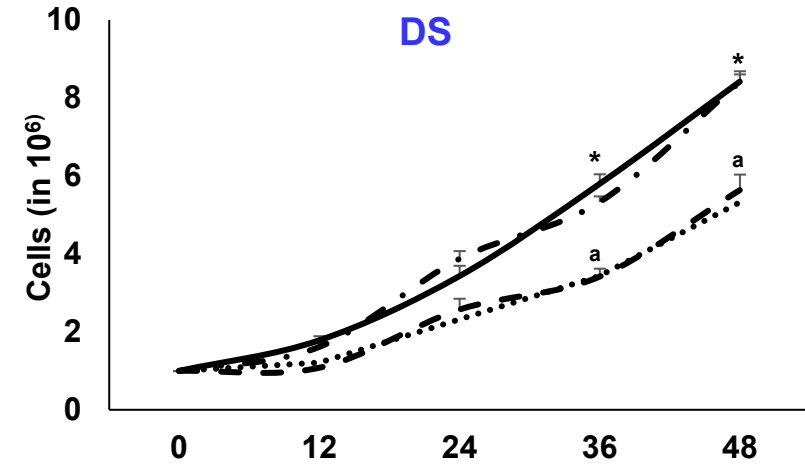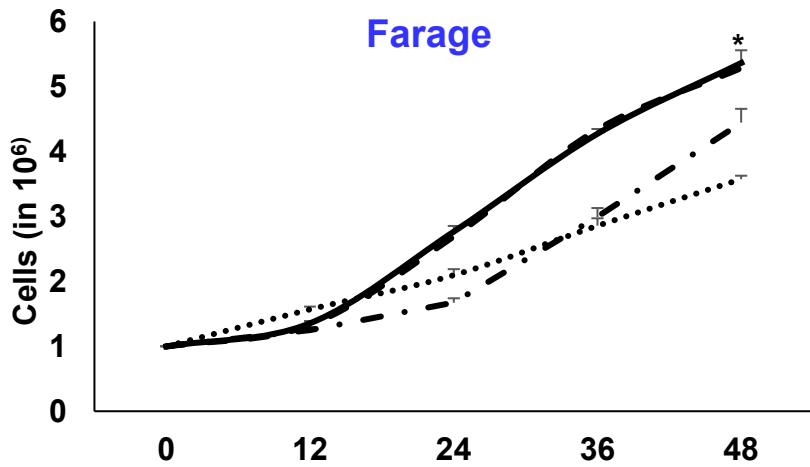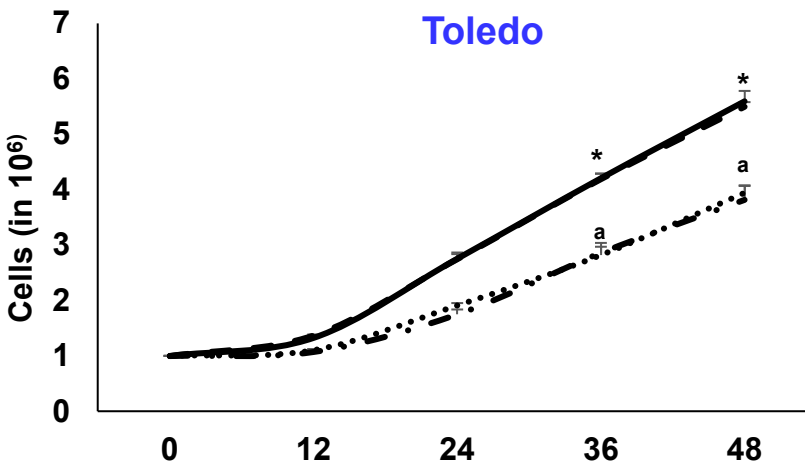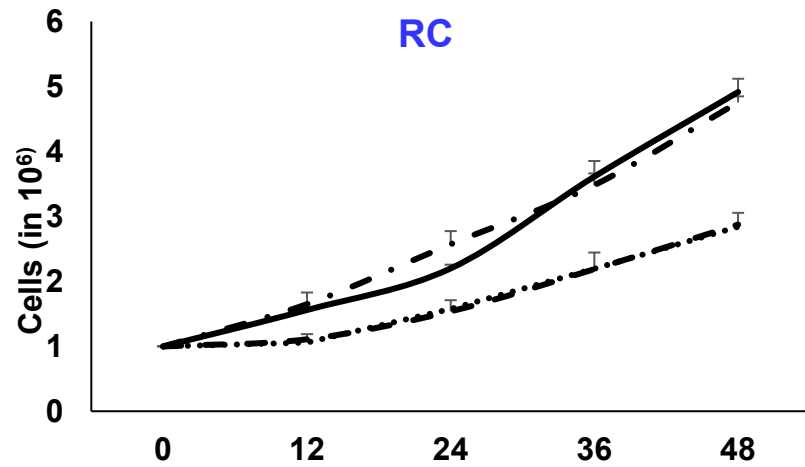

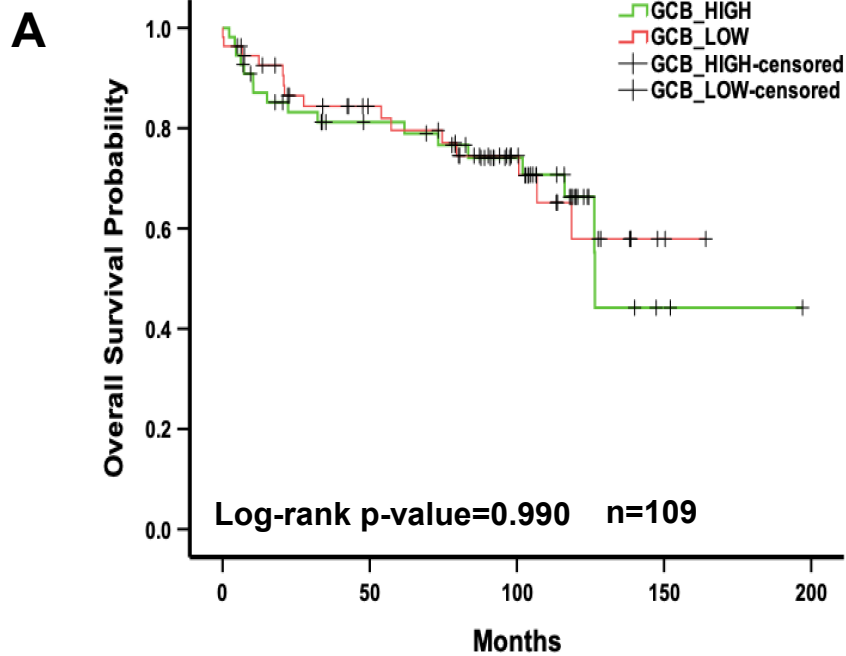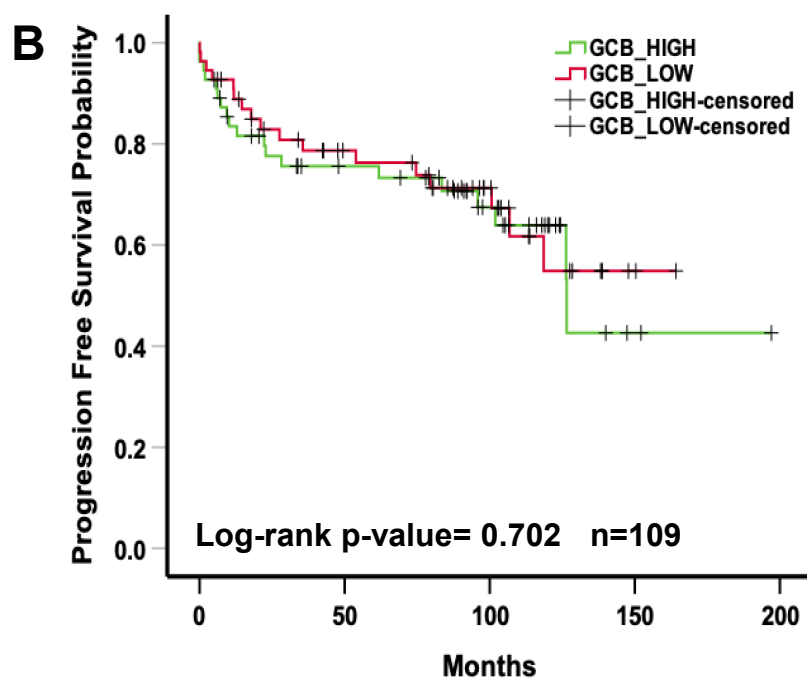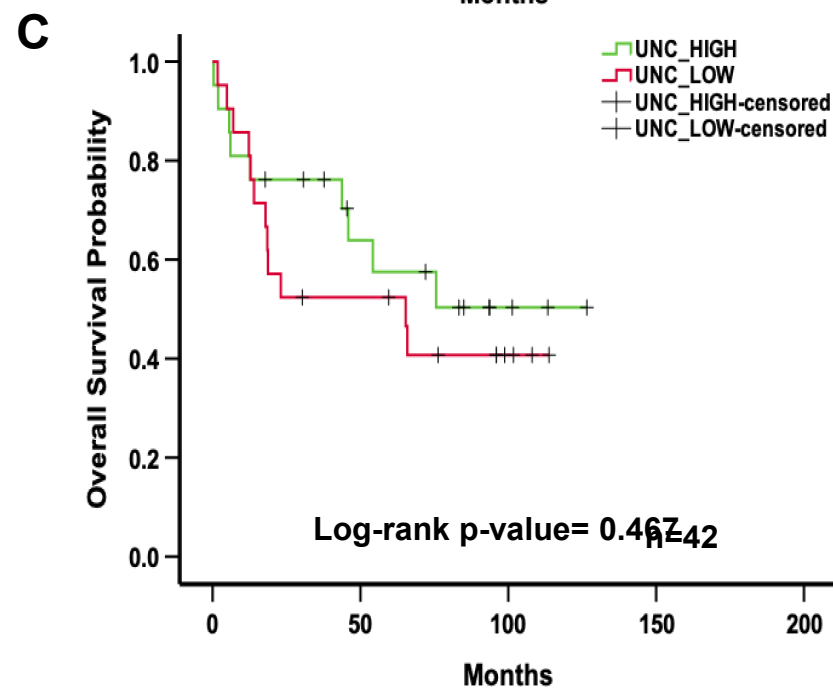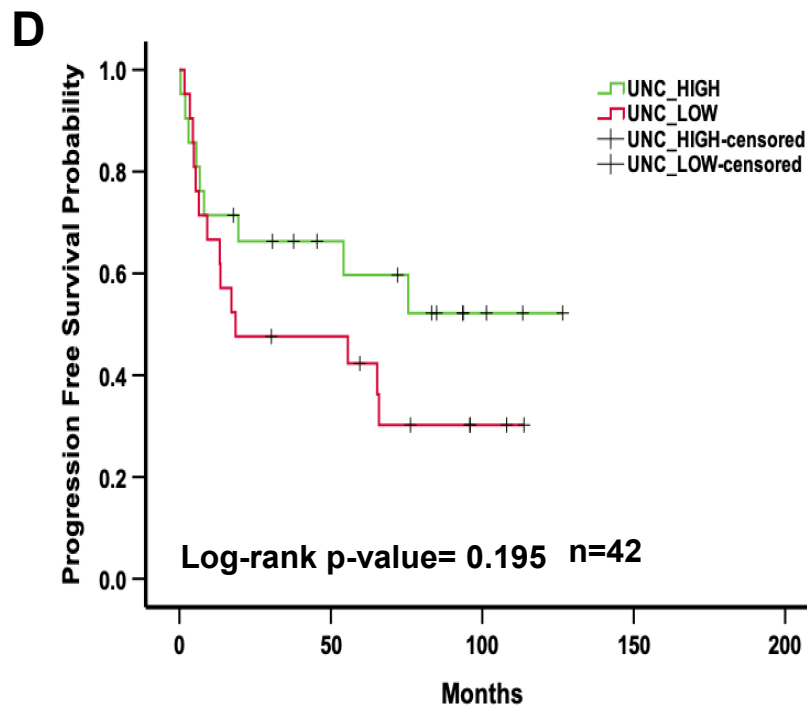

Supplement: mcr-21-0729_supplementary_figures_supp1.pdf [file mcr-21-0729_supplementary_figures_supp1.pdf]
